# Supplementary material for: Detection and Quantification of SARS-CoV-2 and Influenza Viruses in Wastewater Treatment Plants Located in Ticino Region (Switzerland)
Source: Preprints.org preprint supplement (doi:10.20944/preprints202410.0919.v1), 2024-10-11
Supplement: Supplementary file 1 [file supplementary]

Supplementary Material

Detection and quantification of SARS-CoV-2 and influenza viruses in wastewater treatment plants located in Ticino Region

**Table S1.** Number, location, date of collection, Copies/L and Copies/per capita of all samples analyzed for the presence of N1 target specific for SARS-CoV-2.

| ID | Location | Date | Copies/L | Copies/per capita |
| --- | --- | --- | --- | --- |
| 1 | Plant 1 | 2021-03-03 | 2275 | 0.080 |
| 2 | Plant 1 | 2021-03-09 | 4425 | 0.156 |
| 3 | Plant 1 | 2021-03-24 | 2339 | 0.082 |
| 4 | Plant 1 | 2021-03-29 | 4907 | 0.173 |
| 5 | Plant 1 | 2021-04-07 | 1910 | 0.067 |
| 6 | Plant 1 | 2021-04-14 | 4953 | 0.175 |
| 7 | Plant 1 | 2021-04-19 | 2466 | 0.087 |
| 8 | Plant 1 | 2021-04-26 | 1324 | 0.047 |
| 9 | Plant 1 | 2021-05-10 | 3472 | 0.122 |
| 10 | Plant 1 | 2021-05-19 | 2374 | 0.084 |
| 11 | Plant 1 | 2021-05-24 | 1531 | 0.054 |
| 12 | Plant 1 | 2021-05-31 | 13538 | 0.477 |
| 13 | Plant 1 | 2021-06-07 | 4574 | 0.161 |
| 14 | Plant 1 | 2021-06-14 | 925 | 0.033 |
| 15 | Plant 1 | 2021-06-23 | 504 | 0.018 |
| 16 | Plant 1 | 2021-06-30 | 629 | 0.022 |
| 17 | Plant 1 | 2021-07-07 | 7132 | 0.251 |
| 18 | Plant 1 | 2021-07-14 | 4124 | 0.145 |
| 19 | Plant 1 | 2021-07-21 | 6501 | 0.229 |
| 20 | Plant 1 | 2021-07-28 | 2531 | 0.089 |
| 21 | Plant 1 | 2021-08-02 | 10253 | 0.362 |
| 22 | Plant 1 | 2021-08-04 | 929 | 0.033 |
| 23 | Plant 1 | 2021-08-09 | 21023 | 0.741 |
| 24 | Plant 1 | 2021-08-11 | 4996 | 0.176 |
| 25 | Plant 1 | 2021-08-16 | 3007 | 0.106 |
| 26 | Plant 1 | 2021-08-18 | 11104 | 0.392 |
| 27 | Plant 1 | 2021-08-23 | 23564 | 0.831 |
| 28 | Plant 1 | 2021-08-25 | 15308 | 0.540 |
| 29 | Plant 1 | 2021-08-30 | 22301 | 0.786 |
| 30 | Plant 1 | 2021-09-01 | 17571 | 0.620 |
| 31 | Plant 1 | 2021-09-06 | 9941 | 0.351 |
| 32 | Plant 1 | 2021-09-08 | 17488 | 0.617 |
| 33 | Plant 1 | 2021-09-13 | 41987 | 1.481 |
| 34 | Plant 1 | 2021-09-15 | 3080 | 0.109 |
| 35 | Plant 1 | 2021-09-20 | 42164 | 1.487 |
| 36 | Plant 1 | 2021-09-22 | 78515 | 2.769 |
| 37 | Plant 1 | 2021-09-27 | 35006 | 1.234 |
| 38 | Plant 1 | 2021-09-29 | 4637 | 0.164 |
| 39 | Plant 1 | 2021-10-04 | 9342 | 0.329 |
| 40 | Plant 1 | 2021-10-06 | 4203 | 0.148 |
| 41 | Plant 1 | 2021-10-11 | 3068 | 0.108 |
| 42 | Plant 1 | 2021-10-13 | 4816 | 0.170 |
| 43 | Plant 1 | 2021-10-18 | 2509 | 0.088 |
| 44 | Plant 1 | 2021-10-20 | 6816 | 0.240 |
| 45 | Plant 1 | 2021-10-25 | 39140 | 1.380 |
| 46 | Plant 1 | 2021-10-27 | 15551 | 0.548 |
| 47 | Plant 1 | 2021-11-01 | 9664 | 0.341 |
| 48 | Plant 1 | 2021-11-03 | 3180 | 0.112 |
| 49 | Plant 1 | 2021-11-08 | 23825 | 0.840 |
| 50 | Plant 1 | 2021-11-10 | 32139 | 1.133 |
| 51 | Plant 1 | 2021-11-15 | 24235 | 0.855 |
| 52 | Plant 1 | 2021-11-17 | 65166 | 2.298 |
| 53 | Plant 1 | 2021-11-22 | 26135 | 0.922 |
| 54 | Plant 1 | 2021-11-24 | 221646 | 7.816 |
| 55 | Plant 1 | 2021-11-29 | 49358 | 1.741 |
| 56 | Plant 1 | 2021-12-01 | 69881 | 2.464 |
| 57 | Plant 1 | 2021-12-06 | 106400 | 3.752 |
| 58 | Plant 1 | 2021-12-09 | 55850 | 1.969 |
| 59 | Plant 1 | 2021-12-13 | 101256 | 3.571 |
| 60 | Plant 1 | 2021-12-15 | 60970 | 2.150 |
| 61 | Plant 1 | 2021-12-20 | 52344 | 1.846 |
| 62 | Plant 1 | 2021-12-23 | 84059 | 2.964 |
| 63 | Plant 1 | 2021-12-27 | 207416 | 7.314 |
| 64 | Plant 1 | 2021-12-31 | 444216 | 15.665 |
| 65 | Plant 1 | 2022-01-03 | 875010 | 30.856 |
| 66 | Plant 1 | 2022-01-12 | 491225 | 17.322 |
| 67 | Plant 1 | 2022-01-16 | 659778 | 23.266 |
| 68 | Plant 1 | 2022-01-21 | 2247771 | 79.264 |
| 69 | Plant 1 | 2022-01-23 | 1450052 | 51.134 |
| 70 | Plant 1 | 2022-01-26 | 1273945 | 44.924 |
| 71 | Plant 1 | 2022-02-01 | 135386 | 4.774 |
| 72 | Plant 1 | 2022-02-02 | 113156 | 3.990 |
| 73 | Plant 1 | 2022-02-06 | 138511 | 4.884 |
| 74 | Plant 1 | 2022-02-09 | 328400 | 11.581 |
| 75 | Plant 1 | 2022-02-13 | 202156 | 7.129 |
| 76 | Plant 1 | 2022-02-16 | 147598 | 5.205 |
| 77 | Plant 1 | 2022-02-21 | 89572 | 3.159 |
| 78 | Plant 1 | 2022-02-22 | 92722 | 3.270 |
| 79 | Plant 1 | 2022-02-24 | 80173 | 2.827 |
| 80 | Plant 1 | 2022-02-27 | 50142 | 1.768 |
| 81 | Plant 1 | 2022-03-01 | 48462 | 1.709 |
| 82 | Plant 1 | 2022-03-03 | 55145 | 1.945 |
| 83 | Plant 1 | 2022-03-06 | 179638 | 6.335 |
| 84 | Plant 1 | 2022-03-08 | 122909 | 4.334 |
| 85 | Plant 1 | 2022-03-10 | 237177 | 8.364 |
| 86 | Plant 1 | 2022-03-13 | 199597 | 7.038 |
| 87 | Plant 1 | 2022-03-15 | 219534 | 7.742 |
| 88 | Plant 1 | 2022-03-18 | 233206 | 8.224 |
| 89 | Plant 1 | 2022-03-20 | 189994 | 6.700 |
| 90 | Plant 1 | 2022-03-22 | 252056 | 8.888 |
| 91 | Plant 1 | 2022-03-24 | 278052 | 9.805 |
| 92 | Plant 1 | 2022-03-27 | 263007 | 9.275 |
| 93 | Plant 1 | 2022-03-29 | 94079 | 3.318 |
| 94 | Plant 1 | 2022-03-31 | 103112 | 3.636 |
| 95 | Plant 1 | 2022-04-03 | 93016 | 3.280 |
| 96 | Plant 1 | 2022-04-05 | 70967 | 2.503 |
| 97 | Plant 1 | 2022-04-07 | 136599 | 4.817 |
| 98 | Plant 1 | 2022-04-10 | 75577 | 2.665 |
| 99 | Plant 1 | 2022-04-13 | 157708 | 5.561 |
| 100 | Plant 1 | 2022-04-14 | 74987 | 2.644 |
| 101 | Plant 1 | 2022-04-18 | 136525 | 4.814 |
| 102 | Plant 1 | 2022-04-19 | 52568 | 1.854 |
| 103 | Plant 1 | 2022-04-21 | 134223 | 4.733 |
| 104 | Plant 1 | 2022-04-24 | 37207 | 1.312 |
| 105 | Plant 1 | 2022-04-26 | 29965 | 1.057 |
| 106 | Plant 1 | 2022-04-28 | 27561 | 0.972 |
| 107 | Plant 1 | 2022-05-01 | 38540 | 1.359 |
| 108 | Plant 1 | 2022-05-03 | 38046 | 1.342 |
| 109 | Plant 1 | 2022-05-05 | 34498 | 1.217 |
| 110 | Plant 1 | 2022-05-08 | 27638 | 0.975 |
| 111 | Plant 1 | 2022-05-10 | 76514 | 2.698 |
| 112 | Plant 1 | 2022-05-12 | 18369 | 0.648 |
| 113 | Plant 1 | 2022-05-15 | 59786 | 2.108 |
| 114 | Plant 1 | 2022-05-17 | 18381 | 0.648 |
| 115 | Plant 1 | 2022-05-19 | 26535 | 0.936 |
| 116 | Plant 1 | 2022-05-22 | 36399 | 1.284 |
| 117 | Plant 1 | 2022-05-24 | 13312 | 0.469 |
| 118 | Plant 1 | 2022-05-26 | 17899 | 0.631 |
| 119 | Plant 1 | 2022-05-29 | 11155 | 0.393 |
| 120 | Plant 1 | 2022-06-01 | 25382 | 0.895 |
| 121 | Plant 1 | 2022-06-02 | 37712 | 1.330 |
| 122 | Plant 1 | 2022-06-05 | 3784 | 0.133 |
| 123 | Plant 1 | 2022-06-07 | 5540 | 0.195 |
| 124 | Plant 1 | 2022-06-09 | 75753 | 2.671 |
| 125 | Plant 1 | 2022-06-12 | 20307 | 0.716 |
| 126 | Plant 1 | 2022-06-14 | 25328 | 0.893 |
| 127 | Plant 1 | 2022-06-16 | 29025 | 1.024 |
| 128 | Plant 1 | 2022-06-19 | 79561 | 2.806 |
| 129 | Plant 1 | 2022-06-21 | 51579 | 1.819 |
| 130 | Plant 1 | 2022-06-23 | 31543 | 1.112 |
| 131 | Plant 1 | 2022-06-26 | 113522 | 4.003 |
| 132 | Plant 1 | 2022-06-28 | 103793 | 3.660 |
| 133 | Plant 1 | 2022-06-30 | 154488 | 5.448 |
| 134 | Plant 1 | 2022-07-03 | 139353 | 4.914 |
| 135 | Plant 1 | 2022-07-05 | 225481 | 7.951 |
| 136 | Plant 1 | 2022-07-07 | 444447 | 15.673 |
| 137 | Plant 1 | 2022-07-10 | 168793 | 5.952 |
| 138 | Plant 1 | 2022-07-12 | 106274 | 3.748 |
| 139 | Plant 1 | 2022-07-14 | 210489 | 7.423 |
| 140 | Plant 1 | 2022-07-17 | 127567 | 4.498 |
| 141 | Plant 1 | 2022-07-20 | 172975 | 6.100 |
| 142 | Plant 1 | 2022-07-21 | 111077 | 3.917 |
| 143 | Plant 1 | 2022-07-24 | 143548 | 5.062 |
| 144 | Plant 1 | 2022-07-26 | 70535 | 2.487 |
| 145 | Plant 1 | 2022-07-28 | 90302 | 3.184 |
| 146 | Plant 1 | 2022-07-31 | 73396 | 2.588 |
| 147 | Plant 1 | 2022-08-02 | 35341 | 1.246 |
| 148 | Plant 1 | 2022-08-04 | 52283 | 1.844 |
| 149 | Plant 1 | 2022-08-07 | 64578 | 2.277 |
| 150 | Plant 1 | 2022-08-09 | 72437 | 2.554 |
| 151 | Plant 1 | 2022-08-11 | 158195 | 5.578 |
| 152 | Plant 1 | 2022-08-14 | 54576 | 1.925 |
| 153 | Plant 1 | 2022-08-16 | 29860 | 1.053 |
| 154 | Plant 1 | 2022-08-18 | 12650 | 0.446 |
| 155 | Plant 1 | 2022-08-21 | 86228 | 3.041 |
| 156 | Plant 1 | 2022-08-23 | 44453 | 1.568 |
| 157 | Plant 1 | 2022-08-25 | 63367 | 2.235 |
| 158 | Plant 1 | 2022-08-28 | 40402 | 1.425 |
| 159 | Plant 1 | 2022-08-30 | 24849 | 0.876 |
| 160 | Plant 1 | 2022-09-01 | 19974 | 0.704 |
| 161 | Plant 1 | 2022-09-04 | 12858 | 0.453 |
| 162 | Plant 1 | 2022-09-06 | 53063 | 1.871 |
| 163 | Plant 1 | 2022-09-08 | 15407 | 0.543 |
| 164 | Plant 1 | 2022-09-11 | 83442 | 2.942 |
| 165 | Plant 1 | 2022-09-13 | 80076 | 2.824 |
| 166 | Plant 1 | 2022-09-16 | 56841 | 2.004 |
| 167 | Plant 1 | 2022-09-18 | 24217 | 0.854 |
| 168 | Plant 1 | 2022-09-20 | 23074 | 0.814 |
| 169 | Plant 1 | 2022-09-22 | 25814 | 0.910 |
| 170 | Plant 1 | 2022-09-25 | 17994 | 0.635 |
| 171 | Plant 1 | 2022-09-27 | 16616 | 0.586 |
| 172 | Plant 1 | 2022-09-29 | 12001 | 0.423 |
| 173 | Plant 1 | 2022-10-02 | 89452 | 3.154 |
| 174 | Plant 1 | 2022-10-04 | 128446 | 4.529 |
| 175 | Plant 1 | 2022-10-06 | 251141 | 8.856 |
| 176 | Plant 1 | 2022-10-09 | 214133 | 7.551 |
| 177 | Plant 1 | 2022-10-11 | 156944 | 5.534 |
| 178 | Plant 1 | 2022-10-13 | 226244 | 7.978 |
| 179 | Plant 1 | 2022-10-16 | 125729 | 4.434 |
| 180 | Plant 1 | 2022-10-18 | 100839 | 3.556 |
| 181 | Plant 1 | 2022-10-20 | 145773 | 5.140 |
| 182 | Plant 1 | 2022-10-23 | 48872 | 1.723 |
| 183 | Plant 1 | 2022-10-25 | 75401 | 2.659 |
| 184 | Plant 1 | 2022-10-27 | 51948 | 1.832 |
| 185 | Plant 1 | 2022-10-30 | 77373 | 2.728 |
| 186 | Plant 1 | 2022-11-01 | 45003 | 1.587 |
| 187 | Plant 1 | 2022-11-03 | 16962 | 0.598 |
| 188 | Plant 1 | 2022-11-06 | 40574 | 1.431 |
| 189 | Plant 1 | 2022-11-08 | 63297 | 2.232 |
| 190 | Plant 1 | 2022-11-10 | 105177 | 3.709 |
| 191 | Plant 1 | 2022-11-13 | 65589 | 2.313 |
| 192 | Plant 1 | 2022-11-15 | 53912 | 1.901 |
| 193 | Plant 1 | 2022-11-17 | 90569 | 3.194 |
| 194 | Plant 1 | 2022-11-20 | 142478 | 5.024 |
| 195 | Plant 1 | 2022-11-22 | 53242 | 1.877 |
| 196 | Plant 1 | 2022-11-24 | 72796 | 2.567 |
| 197 | Plant 1 | 2022-11-27 | 153968 | 5.429 |
| 198 | Plant 1 | 2022-11-29 | 205093 | 7.232 |
| 199 | Plant 1 | 2022-12-01 | 199816 | 7.046 |
| 200 | Plant 1 | 2022-12-04 | 17388 | 0.613 |
| 201 | Plant 1 | 2022-12-06 | 119735 | 4.222 |
| 202 | Plant 1 | 2022-12-08 | 33693 | 1.188 |
| 203 | Plant 1 | 2022-12-11 | 56016 | 1.975 |
| 204 | Plant 1 | 2022-12-13 | 105031 | 3.704 |
| 205 | Plant 1 | 2022-12-15 | 37079 | 1.308 |
| 206 | Plant 1 | 2022-12-18 | 172596 | 6.086 |
| 207 | Plant 1 | 2022-12-20 | 244597 | 8.625 |
| 208 | Plant 1 | 2022-12-22 | 177308 | 6.252 |
| 209 | Plant 1 | 2022-12-26 | 215966 | 7.616 |
| 210 | Plant 1 | 2022-12-27 | 225808 | 7.963 |
| 211 | Plant 1 | 2022-12-29 | 243277 | 8.579 |
| 212 | Plant 1 | 2023-01-01 | 64893 | 2.288 |
| 213 | Plant 1 | 2023-01-03 | 47414 | 1.672 |
| 214 | Plant 1 | 2023-01-04 | 86578 | 3.053 |
| 215 | Plant 1 | 2023-01-08 | 21927 | 0.773 |
| 216 | Plant 1 | 2023-01-10 | 36910 | 1.302 |
| 217 | Plant 1 | 2023-01-11 | 34306 | 1.210 |
| 218 | Plant 1 | 2023-01-15 | 44696 | 1.576 |
| 219 | Plant 1 | 2023-01-17 | 20341 | 0.717 |
| 220 | Plant 1 | 2023-01-18 | 34349 | 1.211 |
| 221 | Plant 1 | 2023-01-22 | 13733 | 0.484 |
| 222 | Plant 1 | 2023-01-24 | 10825 | 0.382 |
| 223 | Plant 1 | 2023-01-26 | 98734 | 3.482 |
| 224 | Plant 1 | 2023-01-29 | 12588 | 0.444 |
| 225 | Plant 1 | 2023-01-31 | 21516 | 0.759 |
| 226 | Plant 1 | 2023-02-02 | 13796 | 0.486 |
| 227 | Plant 1 | 2023-02-05 | 7288 | 0.257 |
| 228 | Plant 1 | 2023-02-07 | 18231 | 0.643 |
| 229 | Plant 1 | 2023-02-09 | 13786 | 0.486 |
| 230 | Plant 1 | 2023-02-12 | 25147 | 0.887 |
| 231 | Plant 1 | 2023-02-14 | 22370 | 0.789 |
| 232 | Plant 1 | 2023-02-16 | 32143 | 1.133 |
| 233 | Plant 1 | 2023-02-19 | 21346 | 0.753 |
| 234 | Plant 1 | 2023-02-21 | 30221 | 1.066 |
| 235 | Plant 1 | 2023-02-23 | 59312 | 2.092 |
| 236 | Plant 1 | 2023-02-26 | 202040 | 7.125 |
| 237 | Plant 1 | 2023-02-28 | 195338 | 6.888 |
| 238 | Plant 1 | 2023-03-02 | 193287 | 6.816 |
| 239 | Plant 1 | 2023-03-05 | 70013 | 2.469 |
| 240 | Plant 1 | 2023-03-08 | 107508 | 3.791 |
| 241 | Plant 1 | 2023-03-09 | 67150 | 2.368 |
| 242 | Plant 1 | 2023-03-12 | 35231 | 1.242 |
| 243 | Plant 1 | 2023-03-14 | 15263 | 0.538 |
| 244 | Plant 1 | 2023-03-16 | 30641 | 1.081 |
| 245 | Plant 1 | 2023-03-19 | 17190 | 0.606 |
| 246 | Plant 1 | 2023-03-21 | 10498 | 0.370 |
| 247 | Plant 1 | 2023-03-23 | 704643 | 24.848 |
| 248 | Plant 1 | 2023-03-26 | 10774 | 0.380 |
| 249 | Plant 1 | 2023-03-28 | 9837 | 0.347 |
| 250 | Plant 1 | 2023-03-30 | 9357 | 0.330 |
| 251 | Plant 1 | 2023-04-02 | 24790 | 0.874 |
| 252 | Plant 1 | 2023-04-04 | 16631 | 0.586 |
| 253 | Plant 1 | 2023-04-05 | 27533 | 0.971 |
| 254 | Plant 1 | 2023-04-10 | 47341 | 1.669 |
| 255 | Plant 1 | 2023-04-11 | 38055 | 1.342 |
| 256 | Plant 1 | 2023-04-13 | 33985 | 1.198 |
| 257 | Plant 1 | 2023-04-17 | 27130 | 0.957 |
| 258 | Plant 1 | 2023-04-19 | 24352 | 0.859 |
| 259 | Plant 1 | 2023-04-20 | 4803 | 0.169 |
| 260 | Plant 1 | 2023-04-23 | 16331 | 0.576 |
| 261 | Plant 1 | 2023-04-25 | 31683 | 1.117 |
| 262 | Plant 1 | 2023-04-27 | 26905 | 0.949 |
| 263 | Plant 1 | 2023-05-01 | 92410 | 3.259 |
| 264 | Plant 1 | 2023-05-02 | 78972 | 2.785 |
| 265 | Plant 1 | 2023-05-04 | 256400 | 9.042 |
| 266 | Plant 1 | 2023-05-07 | 48594 | 1.714 |
| 267 | Plant 1 | 2023-05-09 | 15187 | 0.536 |
| 268 | Plant 1 | 2023-05-11 | 28409 | 1.002 |
| 269 | Plant 1 | 2023-05-14 | 20383 | 0.719 |
| 270 | Plant 1 | 2023-05-16 | 16625 | 0.586 |
| 271 | Plant 1 | 2023-05-18 | 23250 | 0.820 |
| 272 | Plant 1 | 2023-05-21 | 25930 | 0.914 |
| 273 | Plant 1 | 2023-05-23 | 17040 | 0.601 |
| 274 | Plant 1 | 2023-05-25 | 10262 | 0.362 |
| 275 | Plant 1 | 2023-05-29 | 12893 | 0.455 |
| 276 | Plant 1 | 2023-05-30 | 20767 | 0.732 |
| 277 | Plant 1 | 2023-06-01 | 11607 | 0.409 |
| 278 | Plant 1 | 2023-06-04 | 1285 | 0.045 |
| 279 | Plant 1 | 2023-06-07 | 5720 | 0.202 |
| 280 | Plant 1 | 2023-06-08 | 3253 | 0.115 |
| 281 | Plant 1 | 2023-06-11 | 1285 | 0.045 |
| 282 | Plant 1 | 2023-06-13 | 536 | 0.019 |
| 283 | Plant 1 | 2023-06-15 | 6778 | 0.239 |
| 284 | Plant 1 | 2023-06-18 | 181 | 0.006 |
| 285 | Plant 1 | 2023-06-20 | 0 | 0.000 |
| 286 | Plant 1 | 2023-06-22 | 158 | 0.006 |
| 287 | Plant 1 | 2023-06-25 | 1228 | 0.043 |
| 288 | Plant 1 | 2023-06-27 | 0 | 0.000 |
| 289 | Plant 1 | 2023-06-29 | 0 | 0.000 |
| 290 | Plant 2 | 2021-03-02 | 1061 | 0.020 |
| 291 | Plant 2 | 2021-03-09 | 1030 | 0.019 |
| 292 | Plant 2 | 2021-03-15 | 792 | 0.015 |
| 293 | Plant 2 | 2021-03-22 | 1099 | 0.021 |
| 294 | Plant 2 | 2021-03-29 | 880 | 0.017 |
| 295 | Plant 2 | 2021-04-07 | 1336 | 0.025 |
| 296 | Plant 2 | 2021-04-13 | 3553 | 0.067 |
| 297 | Plant 2 | 2021-04-20 | 788 | 0.015 |
| 298 | Plant 2 | 2021-04-26 | 1210 | 0.023 |
| 299 | Plant 2 | 2021-05-03 | 941 | 0.018 |
| 300 | Plant 2 | 2021-05-11 | 600 | 0.011 |
| 301 | Plant 2 | 2021-05-17 | 6092 | 0.114 |
| 302 | Plant 2 | 2021-05-24 | 2736 | 0.051 |
| 303 | Plant 2 | 2021-06-07 | 3993 | 0.075 |
| 304 | Plant 2 | 2021-06-15 | 1572 | 0.030 |
| 305 | Plant 2 | 2021-06-21 | 1069 | 0.020 |
| 306 | Plant 2 | 2021-07-06 | 1190 | 0.022 |
| 307 | Plant 2 | 2021-07-13 | 2322 | 0.044 |
| 308 | Plant 2 | 2021-07-20 | 4526 | 0.085 |
| 309 | Plant 2 | 2021-08-03 | 6229 | 0.117 |
| 310 | Plant 2 | 2021-08-05 | 6451 | 0.121 |
| 311 | Plant 2 | 2021-08-10 | 14028 | 0.264 |
| 312 | Plant 2 | 2021-08-12 | 13333 | 0.251 |
| 313 | Plant 2 | 2021-08-17 | 15069 | 0.283 |
| 314 | Plant 2 | 2021-08-19 | 21497 | 0.404 |
| 315 | Plant 2 | 2021-08-24 | 19938 | 0.375 |
| 316 | Plant 2 | 2021-08-26 | 47820 | 0.899 |
| 317 | Plant 2 | 2021-08-31 | 19846 | 0.373 |
| 318 | Plant 2 | 2021-09-02 | 158435 | 2.978 |
| 319 | Plant 2 | 2021-09-07 | 31794 | 0.598 |
| 320 | Plant 2 | 2021-09-09 | 125856 | 2.365 |
| 321 | Plant 2 | 2021-09-14 | 111036 | 2.087 |
| 322 | Plant 2 | 2021-09-16 | 91586 | 1.721 |
| 323 | Plant 2 | 2021-09-21 | 28954 | 0.544 |
| 324 | Plant 2 | 2021-09-23 | 42190 | 0.793 |
| 325 | Plant 2 | 2021-09-27 | 126973 | 2.386 |
| 326 | Plant 2 | 2021-09-30 | 22798 | 0.428 |
| 327 | Plant 2 | 2021-10-05 | 6992 | 0.131 |
| 328 | Plant 2 | 2021-10-07 | 9268 | 0.174 |
| 329 | Plant 2 | 2021-10-12 | 11845 | 0.223 |
| 330 | Plant 2 | 2021-10-14 | 19902 | 0.374 |
| 331 | Plant 2 | 2021-10-19 | 9842 | 0.185 |
| 332 | Plant 2 | 2021-10-21 | 38613 | 0.726 |
| 333 | Plant 2 | 2021-10-26 | 212108 | 3.986 |
| 334 | Plant 2 | 2021-10-28 | 95885 | 1.802 |
| 335 | Plant 2 | 2021-11-01 | 17785 | 0.334 |
| 336 | Plant 2 | 2021-11-03 | 19480 | 0.366 |
| 337 | Plant 2 | 2021-11-09 | 22991 | 0.432 |
| 338 | Plant 2 | 2021-11-11 | 126210 | 2.372 |
| 339 | Plant 2 | 2021-11-16 | 156232 | 2.936 |
| 340 | Plant 2 | 2021-11-18 | 154028 | 2.895 |
| 341 | Plant 2 | 2021-11-23 | 124000 | 2.330 |
| 342 | Plant 2 | 2021-11-25 | 262806 | 4.939 |
| 343 | Plant 2 | 2021-11-30 | 103211 | 1.940 |
| 344 | Plant 2 | 2021-12-02 | 222156 | 4.175 |
| 345 | Plant 2 | 2021-12-07 | 140652 | 2.643 |
| 346 | Plant 2 | 2021-12-09 | 106612 | 2.004 |
| 347 | Plant 2 | 2021-12-14 | 275441 | 5.177 |
| 348 | Plant 2 | 2021-12-16 | 379600 | 7.134 |
| 349 | Plant 2 | 2021-12-21 | 363520 | 6.832 |
| 350 | Plant 2 | 2021-12-23 | 402502 | 7.565 |
| 351 | Plant 2 | 2021-12-28 | 482811 | 9.074 |
| 352 | Plant 2 | 2021-12-30 | 530703 | 9.974 |
| 353 | Plant 2 | 2022-01-03 | 1194357 | 22.447 |
| 354 | Plant 2 | 2022-01-05 | 1064516 | 20.006 |
| 355 | Plant 2 | 2022-01-11 | 1432552 | 26.923 |
| 356 | Plant 2 | 2022-01-13 | 1656608 | 31.134 |
| 357 | Plant 2 | 2022-01-18 | 1464234 | 27.519 |
| 358 | Plant 2 | 2022-01-20 | 1244260 | 23.384 |
| 359 | Plant 2 | 2022-01-24 | 1787836 | 33.600 |
| 360 | Plant 2 | 2022-01-27 | 2800248 | 52.627 |
| 361 | Plant 2 | 2022-02-01 | 248262 | 4.666 |
| 362 | Plant 2 | 2022-02-03 | 276976 | 5.205 |
| 363 | Plant 2 | 2022-02-08 | 416471 | 7.827 |
| 364 | Plant 2 | 2022-02-10 | 572866 | 10.766 |
| 365 | Plant 2 | 2022-02-16 | 66279 | 1.246 |
| 366 | Plant 2 | 2022-02-18 | 123998 | 2.330 |
| 367 | Plant 2 | 2022-02-21 | 125135 | 2.352 |
| 368 | Plant 2 | 2022-02-23 | 107016 | 2.011 |
| 369 | Plant 2 | 2022-02-25 | 166849 | 3.136 |
| 370 | Plant 2 | 2022-02-28 | 104791 | 1.969 |
| 371 | Plant 2 | 2022-03-02 | 166349 | 3.126 |
| 372 | Plant 2 | 2022-03-04 | 127278 | 2.392 |
| 373 | Plant 2 | 2022-03-07 | 205646 | 3.865 |
| 374 | Plant 2 | 2022-03-09 | 472608 | 8.882 |
| 375 | Plant 2 | 2022-03-11 | 604427 | 11.359 |
| 376 | Plant 2 | 2022-03-14 | 572983 | 10.769 |
| 377 | Plant 2 | 2022-03-16 | 616478 | 11.586 |
| 378 | Plant 2 | 2022-03-18 | 502460 | 9.443 |
| 379 | Plant 2 | 2022-03-21 | 436828 | 8.210 |
| 380 | Plant 2 | 2022-03-23 | 779259 | 14.645 |
| 381 | Plant 2 | 2022-03-25 | 635515 | 11.944 |
| 382 | Plant 2 | 2022-03-28 | 334397 | 6.285 |
| 383 | Plant 2 | 2022-03-30 | 214581 | 4.033 |
| 384 | Plant 2 | 2022-04-01 | 192953 | 3.626 |
| 385 | Plant 2 | 2022-04-04 | 169483 | 3.185 |
| 386 | Plant 2 | 2022-04-06 | 179449 | 3.373 |
| 387 | Plant 2 | 2022-04-08 | 144032 | 2.707 |
| 388 | Plant 2 | 2022-04-11 | 212797 | 3.999 |
| 389 | Plant 2 | 2022-04-13 | 134198 | 2.522 |
| 390 | Plant 2 | 2022-04-15 | 114265 | 2.147 |
| 391 | Plant 2 | 2022-04-19 | 298299 | 5.606 |
| 392 | Plant 2 | 2022-04-20 | 160130 | 3.009 |
| 393 | Plant 2 | 2022-04-22 | 124028 | 2.331 |
| 394 | Plant 2 | 2022-04-25 | 16514 | 0.310 |
| 395 | Plant 2 | 2022-04-27 | 12588 | 0.237 |
| 396 | Plant 2 | 2022-04-29 | 22869 | 0.430 |
| 397 | Plant 2 | 2022-05-02 | 52852 | 0.993 |
| 398 | Plant 2 | 2022-05-04 | 20978 | 0.394 |
| 399 | Plant 2 | 2022-05-06 | 31388 | 0.590 |
| 400 | Plant 2 | 2022-05-09 | 25367 | 0.477 |
| 401 | Plant 2 | 2022-05-11 | 38337 | 0.720 |
| 402 | Plant 2 | 2022-05-13 | 27042 | 0.508 |
| 403 | Plant 2 | 2022-05-16 | 36270 | 0.682 |
| 404 | Plant 2 | 2022-05-18 | 33435 | 0.628 |
| 405 | Plant 2 | 2022-05-20 | 49102 | 0.923 |
| 406 | Plant 2 | 2022-05-23 | 30834 | 0.579 |
| 407 | Plant 2 | 2022-05-25 | 16714 | 0.314 |
| 408 | Plant 2 | 2022-05-27 | 63744 | 1.198 |
| 409 | Plant 2 | 2022-05-30 | 60527 | 1.138 |
| 410 | Plant 2 | 2022-06-01 | 127437 | 2.395 |
| 411 | Plant 2 | 2022-06-03 | 181235 | 3.406 |
| 412 | Plant 2 | 2022-06-07 | 17803 | 0.335 |
| 413 | Plant 2 | 2022-06-08 | 17307 | 0.325 |
| 414 | Plant 2 | 2022-06-10 | 62214 | 1.169 |
| 415 | Plant 2 | 2022-06-13 | 77206 | 1.451 |
| 416 | Plant 2 | 2022-06-15 | 90300 | 1.697 |
| 417 | Plant 2 | 2022-06-17 | 81726 | 1.536 |
| 418 | Plant 2 | 2022-06-20 | 69169 | 1.300 |
| 419 | Plant 2 | 2022-06-22 | 82233 | 1.545 |
| 420 | Plant 2 | 2022-06-24 | 23655 | 0.445 |
| 421 | Plant 2 | 2022-06-27 | 169332 | 3.182 |
| 422 | Plant 2 | 2022-06-30 | 216488 | 4.069 |
| 423 | Plant 2 | 2022-07-01 | 134871 | 2.535 |
| 424 | Plant 2 | 2022-07-04 | 184896 | 3.475 |
| 425 | Plant 2 | 2022-07-06 | 220397 | 4.142 |
| 426 | Plant 2 | 2022-07-08 | 223608 | 4.202 |
| 427 | Plant 2 | 2022-07-11 | 392102 | 7.369 |
| 428 | Plant 2 | 2022-07-13 | 313077 | 5.884 |
| 429 | Plant 2 | 2022-07-15 | 240426 | 4.519 |
| 430 | Plant 2 | 2022-07-18 | 147188 | 2.766 |
| 431 | Plant 2 | 2022-07-20 | 193917 | 3.644 |
| 432 | Plant 2 | 2022-07-22 | 84937 | 1.596 |
| 433 | Plant 2 | 2022-07-25 | 130934 | 2.461 |
| 434 | Plant 2 | 2022-07-27 | 113940 | 2.141 |
| 435 | Plant 2 | 2022-07-29 | 49717 | 0.934 |
| 436 | Plant 2 | 2022-08-02 | 66304 | 1.246 |
| 437 | Plant 2 | 2022-08-03 | 61323 | 1.152 |
| 438 | Plant 2 | 2022-08-05 | 90984 | 1.710 |
| 439 | Plant 2 | 2022-08-08 | 56106 | 1.054 |
| 440 | Plant 2 | 2022-08-10 | 57532 | 1.081 |
| 441 | Plant 2 | 2022-08-12 | 82749 | 1.555 |
| 442 | Plant 2 | 2022-08-16 | 45352 | 0.852 |
| 443 | Plant 2 | 2022-08-17 | 66574 | 1.251 |
| 444 | Plant 2 | 2022-08-19 | 25784 | 0.485 |
| 445 | Plant 2 | 2022-08-22 | 46338 | 0.871 |
| 446 | Plant 2 | 2022-08-24 | 47349 | 0.890 |
| 447 | Plant 2 | 2022-08-26 | 79715 | 1.498 |
| 448 | Plant 2 | 2022-08-29 | 38132 | 0.717 |
| 449 | Plant 2 | 2022-08-31 | 59295 | 1.114 |
| 450 | Plant 2 | 2022-09-02 | 55264 | 1.039 |
| 451 | Plant 2 | 2022-09-05 | 58915 | 1.107 |
| 452 | Plant 2 | 2022-09-07 | 51927 | 0.976 |
| 453 | Plant 2 | 2022-09-09 | 9911 | 0.186 |
| 454 | Plant 2 | 2022-09-12 | 49488 | 0.930 |
| 455 | Plant 2 | 2022-09-14 | 48450 | 0.911 |
| 456 | Plant 2 | 2022-09-16 | 85628 | 1.609 |
| 457 | Plant 2 | 2022-09-19 | 37898 | 0.712 |
| 458 | Plant 2 | 2022-09-21 | 31538 | 0.593 |
| 459 | Plant 2 | 2022-09-23 | 83295 | 1.565 |
| 460 | Plant 2 | 2022-09-26 | 15477 | 0.291 |
| 461 | Plant 2 | 2022-09-28 | 28103 | 0.528 |
| 462 | Plant 2 | 2022-09-30 | 25546 | 0.480 |
| 463 | Plant 2 | 2022-10-03 | 140130 | 2.634 |
| 464 | Plant 2 | 2022-10-05 | 149121 | 2.803 |
| 465 | Plant 2 | 2022-10-07 | 184771 | 3.473 |
| 466 | Plant 2 | 2022-10-10 | 53100 | 0.998 |
| 467 | Plant 2 | 2022-10-12 | 180529 | 3.393 |
| 468 | Plant 2 | 2022-10-14 | 200338 | 3.765 |
| 469 | Plant 2 | 2022-10-17 | 145900 | 2.742 |
| 470 | Plant 2 | 2022-10-19 | 152248 | 2.861 |
| 471 | Plant 2 | 2022-10-21 | 117868 | 2.215 |
| 472 | Plant 2 | 2022-10-24 | 16412 | 0.308 |
| 473 | Plant 2 | 2022-10-25 | 58504 | 1.100 |
| 474 | Plant 2 | 2022-10-27 | 87405 | 1.643 |
| 475 | Plant 2 | 2022-10-31 | 61649 | 1.159 |
| 476 | Plant 2 | 2022-11-02 | 45562 | 0.856 |
| 477 | Plant 2 | 2022-11-04 | 33663 | 0.633 |
| 478 | Plant 2 | 2022-11-07 | 70957 | 1.334 |
| 479 | Plant 2 | 2022-11-09 | 93498 | 1.757 |
| 480 | Plant 2 | 2022-11-11 | 126887 | 2.385 |
| 481 | Plant 2 | 2022-11-14 | 67542 | 1.269 |
| 482 | Plant 2 | 2022-11-16 | 44387 | 0.834 |
| 483 | Plant 2 | 2022-11-18 | 143777 | 2.702 |
| 484 | Plant 2 | 2022-11-21 | 189716 | 3.565 |
| 485 | Plant 2 | 2022-11-23 | 245900 | 4.621 |
| 486 | Plant 2 | 2022-11-25 | 207642 | 3.902 |
| 487 | Plant 2 | 2022-11-28 | 330265 | 6.207 |
| 488 | Plant 2 | 2022-11-30 | 502635 | 9.446 |
| 489 | Plant 2 | 2022-12-02 | 448039 | 8.420 |
| 490 | Plant 2 | 2022-12-05 | 40728 | 0.765 |
| 491 | Plant 2 | 2022-12-07 | 142243 | 2.673 |
| 492 | Plant 2 | 2022-12-09 | 383739 | 7.212 |
| 493 | Plant 2 | 2022-12-12 | 102652 | 1.929 |
| 494 | Plant 2 | 2022-12-14 | 153256 | 2.880 |
| 495 | Plant 2 | 2022-12-16 | 80857 | 1.520 |
| 496 | Plant 2 | 2022-12-19 | 275600 | 5.180 |
| 497 | Plant 2 | 2022-12-21 | 269859 | 5.072 |
| 498 | Plant 2 | 2022-12-23 | 13110 | 0.246 |
| 499 | Plant 2 | 2022-12-27 | 434311 | 8.162 |
| 500 | Plant 2 | 2022-12-28 | 369071 | 6.936 |
| 501 | Plant 2 | 2022-12-30 | 338996 | 6.371 |
| 502 | Plant 2 | 2023-01-02 | 130498 | 2.453 |
| 503 | Plant 2 | 2023-01-04 | 96961 | 1.822 |
| 504 | Plant 2 | 2023-01-05 | 103681 | 1.949 |
| 505 | Plant 2 | 2023-01-09 | 39847 | 0.749 |
| 506 | Plant 2 | 2023-01-11 | 51772 | 0.973 |
| 507 | Plant 2 | 2023-01-13 | 76896 | 1.445 |
| 508 | Plant 2 | 2023-01-16 | 84300 | 1.584 |
| 509 | Plant 2 | 2023-01-18 | 47295 | 0.889 |
| 510 | Plant 2 | 2023-01-20 | 41124 | 0.773 |
| 511 | Plant 2 | 2023-01-23 | 25897 | 0.487 |
| 512 | Plant 2 | 2023-01-25 | 29938 | 0.563 |
| 513 | Plant 2 | 2023-01-27 | 35316 | 0.664 |
| 514 | Plant 2 | 2023-01-30 | 27348 | 0.514 |
| 515 | Plant 2 | 2023-02-01 | 24133 | 0.454 |
| 516 | Plant 2 | 2023-02-03 | 40984 | 0.770 |
| 517 | Plant 2 | 2023-02-06 | 11008 | 0.207 |
| 518 | Plant 2 | 2023-02-08 | 34313 | 0.645 |
| 519 | Plant 2 | 2023-02-10 | 10630 | 0.200 |
| 520 | Plant 2 | 2023-02-13 | 19188 | 0.361 |
| 521 | Plant 2 | 2023-02-15 | 55575 | 1.044 |
| 522 | Plant 2 | 2023-02-17 | 36341 | 0.683 |
| 523 | Plant 2 | 2023-02-20 | 100345 | 1.886 |
| 524 | Plant 2 | 2023-02-22 | 166884 | 3.136 |
| 525 | Plant 2 | 2023-02-24 | 167795 | 3.154 |
| 526 | Plant 2 | 2023-02-27 | 211155 | 3.968 |
| 527 | Plant 2 | 2023-03-01 | 178408 | 3.353 |
| 528 | Plant 2 | 2023-03-03 | 188458 | 3.542 |
| 529 | Plant 2 | 2023-03-06 | 154624 | 2.906 |
| 530 | Plant 2 | 2023-03-08 | 175991 | 3.308 |
| 531 | Plant 2 | 2023-03-10 | 109476 | 2.057 |
| 532 | Plant 2 | 2023-03-13 | 70700 | 1.329 |
| 533 | Plant 2 | 2023-03-15 | 22432 | 0.422 |
| 534 | Plant 2 | 2023-03-17 | 41659 | 0.783 |
| 535 | Plant 2 | 2023-03-20 | 33543 | 0.630 |
| 536 | Plant 2 | 2023-03-22 | 20628 | 0.388 |
| 537 | Plant 2 | 2023-03-24 | 15880 | 0.298 |
| 538 | Plant 2 | 2023-03-27 | 17411 | 0.327 |
| 539 | Plant 2 | 2023-03-29 | 24448 | 0.459 |
| 540 | Plant 2 | 2023-03-31 | 24008 | 0.451 |
| 541 | Plant 2 | 2023-04-03 | 9749 | 0.183 |
| 542 | Plant 2 | 2023-04-05 | 6517 | 0.122 |
| 543 | Plant 2 | 2023-04-06 | 13789 | 0.259 |
| 544 | Plant 2 | 2023-04-11 | 23807 | 0.447 |
| 545 | Plant 2 | 2023-04-12 | 26946 | 0.506 |
| 546 | Plant 2 | 2023-04-14 | 40238 | 0.756 |
| 547 | Plant 2 | 2023-04-17 | 13928 | 0.262 |
| 548 | Plant 2 | 2023-04-19 | 20270 | 0.381 |
| 549 | Plant 2 | 2023-04-21 | 4393 | 0.083 |
| 550 | Plant 2 | 2023-04-24 | 12983 | 0.244 |
| 551 | Plant 2 | 2023-04-26 | 23880 | 0.449 |
| 552 | Plant 2 | 2023-04-28 | 21663 | 0.407 |
| 553 | Plant 2 | 2023-05-02 | 46838 | 0.880 |
| 554 | Plant 2 | 2023-05-03 | 139915 | 2.630 |
| 555 | Plant 2 | 2023-05-05 | 71125 | 1.337 |
| 556 | Plant 2 | 2023-05-08 | 14885 | 0.280 |
| 557 | Plant 2 | 2023-05-10 | 12557 | 0.236 |
| 558 | Plant 2 | 2023-05-12 | 14308 | 0.269 |
| 559 | Plant 2 | 2023-05-15 | 17329 | 0.326 |
| 560 | Plant 2 | 2023-05-17 | 20382 | 0.383 |
| 561 | Plant 2 | 2023-05-19 | 33031 | 0.621 |
| 562 | Plant 2 | 2023-05-22 | 32753 | 0.616 |
| 563 | Plant 2 | 2023-05-24 | 13602 | 0.256 |
| 564 | Plant 2 | 2023-05-26 | 9493 | 0.178 |
| 565 | Plant 2 | 2023-05-30 | 22796 | 0.428 |
| 566 | Plant 2 | 2023-05-31 | 17859 | 0.336 |
| 567 | Plant 2 | 2023-06-02 | 20777 | 0.390 |
| 568 | Plant 2 | 2023-06-05 | 1630 | 0.031 |
| 569 | Plant 2 | 2023-06-07 | 3427 | 0.064 |
| 570 | Plant 2 | 2023-06-09 | 2598 | 0.049 |
| 571 | Plant 2 | 2023-06-12 | 2675 | 0.050 |
| 572 | Plant 2 | 2023-06-14 | 5477 | 0.103 |
| 573 | Plant 2 | 2023-06-16 | 23938 | 0.450 |
| 574 | Plant 2 | 2023-06-19 | 61 | 0.001 |
| 575 | Plant 2 | 2023-06-21 | 134 | 0.003 |
| 576 | Plant 2 | 2023-06-23 | 375 | 0.007 |
| 577 | Plant 2 | 2023-06-26 | 3098 | 0.058 |
| 578 | Plant 2 | 2023-06-28 | 3522 | 0.066 |
| 579 | Plant 2 | 2023-06-30 | 0 | 0.000 |
| 580 | Plant 3 | 2021-03-02 | 1496 | 0.029 |
| 581 | Plant 3 | 2021-03-08 | 872 | 0.017 |
| 582 | Plant 3 | 2021-03-15 | 1758 | 0.034 |
| 583 | Plant 3 | 2021-03-22 | 2150 | 0.042 |
| 584 | Plant 3 | 2021-03-29 | 2381 | 0.047 |
| 585 | Plant 3 | 2021-04-06 | 2021 | 0.040 |
| 586 | Plant 3 | 2021-04-12 | 2269 | 0.044 |
| 587 | Plant 3 | 2021-04-20 | 893 | 0.017 |
| 588 | Plant 3 | 2021-04-26 | 634 | 0.012 |
| 589 | Plant 3 | 2021-05-03 | 981 | 0.019 |
| 590 | Plant 3 | 2021-05-11 | 822 | 0.016 |
| 591 | Plant 3 | 2021-05-17 | 1832 | 0.036 |
| 592 | Plant 3 | 2021-06-07 | 3353 | 0.066 |
| 593 | Plant 3 | 2021-06-15 | 887 | 0.017 |
| 594 | Plant 3 | 2021-06-21 | 1047 | 0.021 |
| 595 | Plant 3 | 2021-06-30 | 328 | 0.006 |
| 596 | Plant 3 | 2021-07-13 | 4568 | 0.089 |
| 597 | Plant 3 | 2021-07-20 | 6042 | 0.118 |
| 598 | Plant 3 | 2021-07-27 | 947 | 0.019 |
| 599 | Plant 3 | 2021-08-03 | 16297 | 0.319 |
| 600 | Plant 3 | 2021-08-05 | 4376 | 0.086 |
| 601 | Plant 3 | 2021-08-10 | 27099 | 0.531 |
| 602 | Plant 3 | 2021-08-12 | 41198 | 0.807 |
| 603 | Plant 3 | 2021-08-17 | 11045 | 0.216 |
| 604 | Plant 3 | 2021-08-19 | 49568 | 0.971 |
| 605 | Plant 3 | 2021-08-26 | 32798 | 0.642 |
| 606 | Plant 3 | 2021-08-31 | 50991 | 0.999 |
| 607 | Plant 3 | 2021-09-02 | 22758 | 0.446 |
| 608 | Plant 3 | 2021-09-07 | 23986 | 0.470 |
| 609 | Plant 3 | 2021-09-09 | 89908 | 1.761 |
| 610 | Plant 3 | 2021-09-14 | 61376 | 1.202 |
| 611 | Plant 3 | 2021-09-16 | 24609 | 0.482 |
| 612 | Plant 3 | 2021-09-21 | 26836 | 0.526 |
| 613 | Plant 3 | 2021-09-23 | 32282 | 0.632 |
| 614 | Plant 3 | 2021-09-27 | 28587 | 0.560 |
| 615 | Plant 3 | 2021-09-30 | 22658 | 0.444 |
| 616 | Plant 3 | 2021-10-05 | 7625 | 0.149 |
| 617 | Plant 3 | 2021-10-07 | 12345 | 0.242 |
| 618 | Plant 3 | 2021-10-12 | 13055 | 0.256 |
| 619 | Plant 3 | 2021-10-14 | 18613 | 0.365 |
| 620 | Plant 3 | 2021-10-19 | 32236 | 0.631 |
| 621 | Plant 3 | 2021-10-26 | 20386 | 0.399 |
| 622 | Plant 3 | 2021-10-28 | 24556 | 0.481 |
| 623 | Plant 3 | 2021-11-01 | 25524 | 0.500 |
| 624 | Plant 3 | 2021-11-03 | 10490 | 0.205 |
| 625 | Plant 3 | 2021-11-09 | 106838 | 2.092 |
| 626 | Plant 3 | 2021-11-11 | 36991 | 0.724 |
| 627 | Plant 3 | 2021-11-16 | 69710 | 1.365 |
| 628 | Plant 3 | 2021-11-18 | 169100 | 3.312 |
| 629 | Plant 3 | 2021-11-23 | 76127 | 1.491 |
| 630 | Plant 3 | 2021-11-25 | 116272 | 2.277 |
| 631 | Plant 3 | 2021-11-30 | 54790 | 1.073 |
| 632 | Plant 3 | 2021-12-02 | 75628 | 1.481 |
| 633 | Plant 3 | 2021-12-07 | 83322 | 1.632 |
| 634 | Plant 3 | 2021-12-09 | 46100 | 0.903 |
| 635 | Plant 3 | 2021-12-14 | 124172 | 2.432 |
| 636 | Plant 3 | 2021-12-16 | 481814 | 9.436 |
| 637 | Plant 3 | 2021-12-21 | 141604 | 2.773 |
| 638 | Plant 3 | 2021-12-23 | 186671 | 3.656 |
| 639 | Plant 3 | 2021-12-28 | 378442 | 7.412 |
| 640 | Plant 3 | 2021-12-30 | 408094 | 7.992 |
| 641 | Plant 3 | 2022-01-03 | 907096 | 17.765 |
| 642 | Plant 3 | 2022-01-05 | 877843 | 17.192 |
| 643 | Plant 3 | 2022-01-11 | 1080764 | 21.166 |
| 644 | Plant 3 | 2022-01-13 | 1290075 | 25.265 |
| 645 | Plant 3 | 2022-01-18 | 833708 | 16.328 |
| 646 | Plant 3 | 2022-01-20 | 1775740 | 34.777 |
| 647 | Plant 3 | 2022-01-24 | 2768221 | 54.214 |
| 648 | Plant 3 | 2022-01-27 | 2426021 | 47.512 |
| 649 | Plant 3 | 2022-02-01 | 193765 | 3.795 |
| 650 | Plant 3 | 2022-02-03 | 261044 | 5.112 |
| 651 | Plant 3 | 2022-02-08 | 462556 | 9.059 |
| 652 | Plant 3 | 2022-02-10 | 339232 | 6.644 |
| 653 | Plant 3 | 2022-02-16 | 132728 | 2.599 |
| 654 | Plant 3 | 2022-02-18 | 174386 | 3.415 |
| 655 | Plant 3 | 2022-02-21 | 62573 | 1.225 |
| 656 | Plant 3 | 2022-02-22 | 88071 | 1.725 |
| 657 | Plant 3 | 2022-02-25 | 62847 | 1.231 |
| 658 | Plant 3 | 2022-02-28 | 107197 | 2.099 |
| 659 | Plant 3 | 2022-02-02 | 125808 | 2.464 |
| 660 | Plant 3 | 2022-02-04 | 218967 | 4.288 |
| 661 | Plant 3 | 2022-02-07 | 127304 | 2.493 |
| 662 | Plant 3 | 2022-03-09 | 381178 | 7.465 |
| 663 | Plant 3 | 2022-03-11 | 293344 | 5.745 |
| 664 | Plant 3 | 2022-03-14 | 357778 | 7.007 |
| 665 | Plant 3 | 2022-03-16 | 400316 | 7.840 |
| 666 | Plant 3 | 2022-03-18 | 398566 | 7.806 |
| 667 | Plant 3 | 2022-03-21 | 497552 | 9.744 |
| 668 | Plant 3 | 2022-03-23 | 613868 | 12.022 |
| 669 | Plant 3 | 2022-03-25 | 396354 | 7.762 |
| 670 | Plant 3 | 2022-03-28 | 404282 | 7.918 |
| 671 | Plant 3 | 2022-03-30 | 246925 | 4.836 |
| 672 | Plant 3 | 2022-04-01 | 96593 | 1.892 |
| 673 | Plant 3 | 2022-04-04 | 180994 | 3.545 |
| 674 | Plant 3 | 2022-04-06 | 183128 | 3.586 |
| 675 | Plant 3 | 2022-04-08 | 307304 | 6.018 |
| 676 | Plant 3 | 2022-04-11 | 164349 | 3.219 |
| 677 | Plant 3 | 2022-04-13 | 148682 | 2.912 |
| 678 | Plant 3 | 2022-04-15 | 285001 | 5.582 |
| 679 | Plant 3 | 2022-04-18 | 286134 | 5.604 |
| 680 | Plant 3 | 2022-04-20 | 114313 | 2.239 |
| 681 | Plant 3 | 2022-04-22 | 319633 | 6.260 |
| 682 | Plant 3 | 2022-04-25 | 32038 | 0.627 |
| 683 | Plant 3 | 2022-04-27 | 21136 | 0.414 |
| 684 | Plant 3 | 2022-04-29 | 25538 | 0.500 |
| 685 | Plant 3 | 2022-05-02 | 69959 | 1.370 |
| 686 | Plant 3 | 2022-05-04 | 33270 | 0.652 |
| 687 | Plant 3 | 2022-05-06 | 26972 | 0.528 |
| 688 | Plant 3 | 2022-05-09 | 32048 | 0.628 |
| 689 | Plant 3 | 2022-05-11 | 23933 | 0.469 |
| 690 | Plant 3 | 2022-05-13 | 14157 | 0.277 |
| 691 | Plant 3 | 2022-05-16 | 70995 | 1.390 |
| 692 | Plant 3 | 2022-05-18 | 35541 | 0.696 |
| 693 | Plant 3 | 2022-05-20 | 35553 | 0.696 |
| 694 | Plant 3 | 2022-05-23 | 35563 | 0.696 |
| 695 | Plant 3 | 2022-05-25 | 34826 | 0.682 |
| 696 | Plant 3 | 2022-05-27 | 50086 | 0.981 |
| 697 | Plant 3 | 2022-05-30 | 32789 | 0.642 |
| 698 | Plant 3 | 2022-06-01 | 83915 | 1.643 |
| 699 | Plant 3 | 2022-06-03 | 87225 | 1.708 |
| 700 | Plant 3 | 2022-06-07 | 54802 | 1.073 |
| 701 | Plant 3 | 2022-06-08 | 45572 | 0.893 |
| 702 | Plant 3 | 2022-06-10 | 65186 | 1.277 |
| 703 | Plant 3 | 2022-06-13 | 79176 | 1.551 |
| 704 | Plant 3 | 2022-06-15 | 118752 | 2.326 |
| 705 | Plant 3 | 2022-06-20 | 71006 | 1.391 |
| 706 | Plant 3 | 2022-06-22 | 124973 | 2.448 |
| 707 | Plant 3 | 2022-06-24 | 100092 | 1.960 |
| 708 | Plant 3 | 2022-06-27 | 253142 | 4.958 |
| 709 | Plant 3 | 2022-06-30 | 301333 | 5.901 |
| 710 | Plant 3 | 2022-07-01 | 194348 | 3.806 |
| 711 | Plant 3 | 2022-07-04 | 295958 | 5.796 |
| 712 | Plant 3 | 2022-07-06 | 293151 | 5.741 |
| 713 | Plant 3 | 2022-07-08 | 222241 | 4.352 |
| 714 | Plant 3 | 2022-07-11 | 388051 | 7.600 |
| 715 | Plant 3 | 2022-07-13 | 376382 | 7.371 |
| 716 | Plant 3 | 2022-07-15 | 323549 | 6.337 |
| 717 | Plant 3 | 2022-07-18 | 195242 | 3.824 |
| 718 | Plant 3 | 2022-07-20 | 216460 | 4.239 |
| 719 | Plant 3 | 2022-07-22 | 147671 | 2.892 |
| 720 | Plant 3 | 2022-07-25 | 174651 | 3.420 |
| 721 | Plant 3 | 2022-07-27 | 93536 | 1.832 |
| 722 | Plant 3 | 2022-07-29 | 99991 | 1.958 |
| 723 | Plant 3 | 2022-08-02 | 78218 | 1.532 |
| 724 | Plant 3 | 2022-08-03 | 82042 | 1.607 |
| 725 | Plant 3 | 2022-08-05 | 74287 | 1.455 |
| 726 | Plant 3 | 2022-08-08 | 178927 | 3.504 |
| 727 | Plant 3 | 2022-08-10 | 132392 | 2.593 |
| 728 | Plant 3 | 2022-08-12 | 109696 | 2.148 |
| 729 | Plant 3 | 2022-08-15 | 90186 | 1.766 |
| 730 | Plant 3 | 2022-08-17 | 76726 | 1.503 |
| 731 | Plant 3 | 2022-08-19 | 39288 | 0.769 |
| 732 | Plant 3 | 2022-08-22 | 141017 | 2.762 |
| 733 | Plant 3 | 2022-08-24 | 120521 | 2.360 |
| 734 | Plant 3 | 2022-08-26 | 105292 | 2.062 |
| 735 | Plant 3 | 2022-08-29 | 71929 | 1.409 |
| 736 | Plant 3 | 2022-08-31 | 85122 | 1.667 |
| 737 | Plant 3 | 2022-09-02 | 49664 | 0.973 |
| 738 | Plant 3 | 2022-09-05 | 62495 | 1.224 |
| 739 | Plant 3 | 2022-09-07 | 81670 | 1.599 |
| 740 | Plant 3 | 2022-09-09 | 33675 | 0.660 |
| 741 | Plant 3 | 2022-09-12 | 226554 | 4.437 |
| 742 | Plant 3 | 2022-09-14 | 163351 | 3.199 |
| 743 | Plant 3 | 2022-09-16 | 165221 | 3.236 |
| 744 | Plant 3 | 2022-09-21 | 25548 | 0.500 |
| 745 | Plant 3 | 2022-09-23 | 40022 | 0.784 |
| 746 | Plant 3 | 2022-09-26 | 18740 | 0.367 |
| 747 | Plant 3 | 2022-09-28 | 33986 | 0.666 |
| 748 | Plant 3 | 2022-09-30 | 76045 | 1.489 |
| 749 | Plant 3 | 2022-10-03 | 198208 | 3.882 |
| 750 | Plant 3 | 2022-10-04 | 1034846 | 20.267 |
| 751 | Plant 3 | 2022-10-07 | 191616 | 3.753 |
| 752 | Plant 3 | 2022-10-09 | 55483 | 1.087 |
| 753 | Plant 3 | 2022-10-11 | 258905 | 5.070 |
| 754 | Plant 3 | 2022-10-13 | 426912 | 8.361 |
| 755 | Plant 3 | 2022-10-16 | 296223 | 5.801 |
| 756 | Plant 3 | 2022-10-18 | 198098 | 3.880 |
| 757 | Plant 3 | 2022-10-20 | 154442 | 3.025 |
| 758 | Plant 3 | 2022-10-23 | 23951 | 0.469 |
| 759 | Plant 3 | 2022-10-25 | 59186 | 1.159 |
| 760 | Plant 3 | 2022-10-27 | 60913 | 1.193 |
| 761 | Plant 3 | 2022-11-02 | 92157 | 1.805 |
| 762 | Plant 3 | 2022-11-04 | 36612 | 0.717 |
| 763 | Plant 3 | 2022-11-07 | 146101 | 2.861 |
| 764 | Plant 3 | 2022-11-09 | 93829 | 1.838 |
| 765 | Plant 3 | 2022-11-11 | 93456 | 1.830 |
| 766 | Plant 3 | 2022-11-14 | 145912 | 2.858 |
| 767 | Plant 3 | 2022-11-16 | 66230 | 1.297 |
| 768 | Plant 3 | 2022-11-18 | 101961 | 1.997 |
| 769 | Plant 3 | 2022-11-21 | 200995 | 3.936 |
| 770 | Plant 3 | 2022-11-23 | 200857 | 3.934 |
| 771 | Plant 3 | 2022-11-25 | 257062 | 5.034 |
| 772 | Plant 3 | 2022-11-28 | 216082 | 4.232 |
| 773 | Plant 3 | 2022-11-30 | 387494 | 7.589 |
| 774 | Plant 3 | 2022-12-02 | 363195 | 7.113 |
| 775 | Plant 3 | 2022-12-05 | 37612 | 0.737 |
| 776 | Plant 3 | 2022-12-07 | 195416 | 3.827 |
| 777 | Plant 3 | 2022-12-09 | 189428 | 3.710 |
| 778 | Plant 3 | 2022-12-12 | 102745 | 2.012 |
| 779 | Plant 3 | 2022-12-14 | 112477 | 2.203 |
| 780 | Plant 3 | 2022-12-16 | 75790 | 1.484 |
| 781 | Plant 3 | 2022-12-19 | 399885 | 7.832 |
| 782 | Plant 3 | 2022-12-21 | 249572 | 4.888 |
| 783 | Plant 3 | 2022-12-23 | 196386 | 3.846 |
| 784 | Plant 3 | 2022-12-27 | 373668 | 7.318 |
| 785 | Plant 3 | 2022-12-28 | 409099 | 8.012 |
| 786 | Plant 3 | 2022-12-30 | 248136 | 4.860 |
| 787 | Plant 3 | 2023-01-02 | 107979 | 2.115 |
| 788 | Plant 3 | 2023-01-04 | 80538 | 1.577 |
| 789 | Plant 3 | 2023-01-05 | 93569 | 1.832 |
| 790 | Plant 3 | 2023-01-05 | 64780 | 1.269 |
| 791 | Plant 3 | 2023-01-11 | 78284 | 1.533 |
| 792 | Plant 3 | 2023-01-13 | 79152 | 1.550 |
| 793 | Plant 3 | 2023-01-16 | 47779 | 0.936 |
| 794 | Plant 3 | 2023-01-18 | 44634 | 0.874 |
| 795 | Plant 3 | 2023-01-20 | 79338 | 1.554 |
| 796 | Plant 3 | 2023-01-23 | 34384 | 0.673 |
| 797 | Plant 3 | 2023-01-24 | 110506 | 2.164 |
| 798 | Plant 3 | 2023-01-26 | 49087 | 0.961 |
| 799 | Plant 3 | 2023-01-30 | 25666 | 0.503 |
| 800 | Plant 3 | 2023-02-01 | 12532 | 0.245 |
| 801 | Plant 3 | 2023-02-03 | 23126 | 0.453 |
| 802 | Plant 3 | 2023-02-05 | 8175 | 0.160 |
| 803 | Plant 3 | 2023-02-08 | 13084 | 0.256 |
| 804 | Plant 3 | 2023-02-10 | 21126 | 0.414 |
| 805 | Plant 3 | 2023-02-13 | 41886 | 0.820 |
| 806 | Plant 3 | 2023-02-15 | 39544 | 0.774 |
| 807 | Plant 3 | 2023-02-17 | 41585 | 0.814 |
| 808 | Plant 3 | 2023-02-20 | 53791 | 1.053 |
| 809 | Plant 3 | 2023-02-22 | 70342 | 1.378 |
| 810 | Plant 3 | 2023-02-24 | 148984 | 2.918 |
| 811 | Plant 3 | 2023-02-27 | 216074 | 4.232 |
| 812 | Plant 3 | 2023-03-01 | 247813 | 4.853 |
| 813 | Plant 3 | 2023-03-03 | 233059 | 4.564 |
| 814 | Plant 3 | 2023-03-06 | 87026 | 1.704 |
| 815 | Plant 3 | 2023-03-08 | 128986 | 2.526 |
| 816 | Plant 3 | 2023-03-10 | 166368 | 3.258 |
| 817 | Plant 3 | 2023-03-12 | 46449 | 0.910 |
| 818 | Plant 3 | 2023-03-15 | 26922 | 0.527 |
| 819 | Plant 3 | 2023-03-17 | 23422 | 0.459 |
| 820 | Plant 3 | 2023-03-20 | 9740 | 0.191 |
| 821 | Plant 3 | 2023-03-22 | 10062 | 0.197 |
| 822 | Plant 3 | 2023-03-24 | 8964 | 0.176 |
| 823 | Plant 3 | 2023-03-27 | 26418 | 0.517 |
| 824 | Plant 3 | 2023-03-29 | 17496 | 0.343 |
| 825 | Plant 3 | 2023-03-31 | 15361 | 0.301 |
| 826 | Plant 3 | 2023-04-03 | 16583 | 0.325 |
| 827 | Plant 3 | 2023-04-05 | 20477 | 0.401 |
| 828 | Plant 3 | 2023-04-06 | 9397 | 0.184 |
| 829 | Plant 3 | 2023-04-11 | 42106 | 0.825 |
| 830 | Plant 3 | 2023-04-12 | 39168 | 0.767 |
| 831 | Plant 3 | 2023-04-14 | 31172 | 0.610 |
| 832 | Plant 3 | 2023-04-17 | 13129 | 0.257 |
| 833 | Plant 3 | 2023-04-19 | 15567 | 0.305 |
| 834 | Plant 3 | 2023-04-21 | 22501 | 0.441 |
| 835 | Plant 3 | 2023-04-24 | 16805 | 0.329 |
| 836 | Plant 3 | 2023-04-25 | 32501 | 0.637 |
| 837 | Plant 3 | 2023-04-27 | 20702 | 0.405 |
| 838 | Plant 3 | 2023-05-02 | 52878 | 1.036 |
| 839 | Plant 3 | 2023-05-03 | 143436 | 2.809 |
| 840 | Plant 3 | 2023-05-05 | 143899 | 2.818 |
| 841 | Plant 3 | 2023-05-10 | 35488 | 0.695 |
| 842 | Plant 3 | 2023-05-12 | 36463 | 0.714 |
| 843 | Plant 3 | 2023-05-15 | 19072 | 0.374 |
| 844 | Plant 3 | 2023-05-17 | 28746 | 0.563 |
| 845 | Plant 3 | 2023-05-19 | 21821 | 0.427 |
| 846 | Plant 3 | 2023-05-22 | 22722 | 0.445 |
| 847 | Plant 3 | 2023-05-24 | 53595 | 1.050 |
| 848 | Plant 3 | 2023-05-26 | 13278 | 0.260 |
| 849 | Plant 3 | 2023-05-31 | 36735 | 0.719 |
| 850 | Plant 3 | 2023-06-02 | 43646 | 0.855 |
| 851 | Plant 3 | 2023-06-05 | 4080 | 0.080 |
| 852 | Plant 3 | 2023-06-06 | 2284 | 0.045 |
| 853 | Plant 3 | 2023-06-09 | 2802 | 0.055 |
| 854 | Plant 3 | 2023-06-12 | 11597 | 0.227 |
| 855 | Plant 3 | 2023-06-14 | 4659 | 0.091 |
| 856 | Plant 3 | 2023-06-16 | 737 | 0.014 |
| 857 | Plant 3 | 2023-06-19 | 214 | 0.004 |
| 858 | Plant 3 | 2023-06-20 | 110 | 0.002 |
| 859 | Plant 3 | 2023-06-23 | 117 | 0.002 |
| 860 | Plant 3 | 2023-06-26 | 1216 | 0.024 |
| 861 | Plant 3 | 2023-06-27 | 876 | 0.017 |
| 862 | Plant 3 | 2023-06-30 | 1550 | 0.030 |

**Table S2.** Number, location, date of collection, Copies/L and Copies/per capita of all samples analyzed for the presence of influenza A and B targets (M and NS).

| ID | Location | Date | Copies/influenza A | Copies/Influenza B | Influenza A/Per capita | Influenza B /Per capita |
| --- | --- | --- | --- | --- | --- | --- |
| 667 | Plant 1 | 2022-10-09 | 0 | 0 | 0.000 | 0.000 |
| 672 | Plant 1 | 2022-10-11 | 0 | 0 | 0.000 | 0.000 |
| 677 | Plant 1 | 2022-10-13 | 928 | 0 | 0.033 | 0.000 |
| 682 | Plant 1 | 2022-10-16 | 0 | 0 | 0.000 | 0.000 |
| 687 | Plant 1 | 2022-10-18 | 0 | 0 | 0.000 | 0.000 |
| 692 | Plant 1 | 2022-10-20 | 0 | 0 | 0.000 | 0.000 |
| 697 | Plant 1 | 2022-10-23 | 0 | 0 | 0.000 | 0.000 |
| 702 | Plant 1 | 2022-10-25 | 757 | 323 | 0.027 | 0.011 |
| 707 | Plant 1 | 2022-10-27 | 462 | 0 | 0.016 | 0.000 |
| 712 | Plant 1 | 2022-10-30 | 0 | 0 | 0.000 | 0.000 |
| 716 | Plant 1 | 2022-11-01 | 1144 | 0 | 0.040 | 0.000 |
| 721 | Plant 1 | 2022-11-03 | 203 | 0 | 0.007 | 0.000 |
| 726 | Plant 1 | 2022-11-06 | 271 | 569 | 0.010 | 0.020 |
| 731 | Plant 1 | 2022-11-08 | 7932 | 0 | 0.280 | 0.000 |
| 736 | Plant 1 | 2022-11-10 | 4920 | 0 | 0.173 | 0.000 |
| 741 | Plant 1 | 2022-11-13 | 1953 | 2556 | 0.069 | 0.090 |
| 745 | Plant 1 | 2022-11-15 | 8582 | 0 | 0.303 | 0.000 |
| 754 | Plant 1 | 2022-11-17 | 4707 | 368 | 0.166 | 0.013 |
| 759 | Plant 1 | 2022-11-20 | 6077 | 457 | 0.214 | 0.016 |
| 764 | Plant 1 | 2022-11-22 | 31537 | 0 | 1.112 | 0.000 |
| 769 | Plant 1 | 2022-11-24 | 4614 | 1046 | 0.163 | 0.037 |
| 774 | Plant 1 | 2022-11-27 | 6129 | 868 | 0.216 | 0.031 |
| 779 | Plant 1 | 2022-11-29 | 25840 | 15111 | 0.911 | 0.533 |
| 784 | Plant 1 | 2022-12-01 | 13402 | 2954 | 0.473 | 0.104 |
| 789 | Plant 1 | 2022-12-04 | 5274 | 613 | 0.186 | 0.022 |
| 794 | Plant 1 | 2022-12-06 | 83507 | 8617 | 2.945 | 0.304 |
| 799 | Plant 1 | 2022-12-08 | 9714 | 2825 | 0.343 | 0.100 |
| 804 | Plant 1 | 2022-12-11 | 14544 | 4623 | 0.513 | 0.163 |
| 809 | Plant 1 | 2022-12-13 | 108730 | 1609 | 3.834 | 0.057 |
| 814 | Plant 1 | 2022-12-15 | 14834 | 209 | 0.523 | 0.007 |
| 819 | Plant 1 | 2022-12-18 | 83626 | 0 | 2.949 | 0.000 |
| 824 | Plant 1 | 2022-12-20 | 33441 | 0 | 1.179 | 0.000 |
| 829 | Plant 1 | 2022-12-22 | 40184 | 2045 | 1.417 | 0.072 |
| 834 | Plant 1 | 2022-12-26 | 56781 | 7566 | 2.002 | 0.267 |
| 839 | Plant 1 | 2022-12-27 | 13152 | 2209 | 0.464 | 0.078 |
| 844 | Plant 1 | 2022-12-29 | 11756 | 3733 | 0.415 | 0.132 |
| 853 | Plant 1 | 2023-01-01 | 6226 | 1778 | 0.220 | 0.063 |
| 854 | Plant 1 | 2023-01-03 | 7522 | 1402 | 0.265 | 0.049 |
| 855 | Plant 1 | 2023-01-04 | 48400 | 25458 | 1.707 | 0.898 |
| 856 | Plant 1 | 2023-01-08 | 2299 | 369 | 0.081 | 0.013 |
| 861 | Plant 1 | 2023-01-10 | 8556 | 7485 | 0.302 | 0.264 |
| 862 | Plant 1 | 2023-01-11 | 15869 | 12418 | 0.560 | 0.438 |
| 869 | Plant 1 | 2023-01-15 | 3840 | 14428 | 0.135 | 0.509 |
| 870 | Plant 1 | 2023-01-17 | 2097 | 5480 | 0.074 | 0.193 |
| 871 | Plant 1 | 2023-01-18 | 8361 | 19543 | 0.295 | 0.689 |
| 875 | Plant 1 | 2023-01-22 | 2789 | 45765 | 0.098 | 1.614 |
| 879 | Plant 1 | 2023-01-24 | 558 | 32446 | 0.020 | 1.144 |
| 881 | Plant 1 | 2023-01-26 | 723 | 4957 | 0.025 | 0.175 |
| 884 | Plant 1 | 2023-01-29 | 432 | 8212 | 0.015 | 0.290 |
| 887 | Plant 1 | 2023-01-31 | 1917 | 7106 | 0.068 | 0.251 |
| 890 | Plant 1 | 2023-02-02 | 308 | 16696 | 0.011 | 0.589 |
| 893 | Plant 1 | 2023-02-05 | 2551 | 8183 | 0.090 | 0.289 |
| 896 | Plant 1 | 2023-02-07 | 1624 | 10710 | 0.057 | 0.378 |
| 899 | Plant 1 | 2023-02-09 | 3982 | 32272 | 0.140 | 1.138 |
| 902 | Plant 1 | 2023-02-12 | 1916 | 19846 | 0.068 | 0.700 |
| 905 | Plant 1 | 2023-02-14 | 3479 | 27796 | 0.123 | 0.980 |
| 908 | Plant 1 | 2023-02-16 | 2446 | 19115 | 0.086 | 0.674 |
| 911 | Plant 1 | 2023-02-19 | 5635 | 18399 | 0.199 | 0.649 |
| 914 | Plant 1 | 2023-02-21 | 6375 | 56598 | 0.225 | 1.996 |
| 917 | Plant 1 | 2023-02-23 | 6550 | 26278 | 0.231 | 0.927 |
| 920 | Plant 1 | 2023-02-26 | 4710 | 22865 | 0.166 | 0.806 |
| 923 | Plant 1 | 2023-02-28 | 4594 | 18655 | 0.162 | 0.658 |
| 926 | Plant 1 | 2023-03-02 | 1097 | 10566 | 0.039 | 0.373 |
| 929 | Plant 1 | 2023-03-05 | 4264 | 9521 | 0.150 | 0.336 |
| 932 | Plant 1 | 2023-03-08 | 438 | 9402 | 0.015 | 0.332 |
| 935 | Plant 1 | 2023-03-09 | 825 | 8636 | 0.029 | 0.305 |
| 938 | Plant 1 | 2023-03-12 | 791 | 9784 | 0.028 | 0.345 |
| 941 | Plant 1 | 2023-03-14 | 1917 | 5641 | 0.068 | 0.199 |
| 944 | Plant 1 | 2023-03-16 | 800 | 7070 | 0.028 | 0.249 |
| 947 | Plant 1 | 2023-03-19 | 322 | 9023 | 0.011 | 0.318 |
| 950 | Plant 1 | 2023-03-21 | 267 | 15613 | 0.009 | 0.551 |
| 953 | Plant 1 | 2023-03-23 | 686 | 5357 | 0.024 | 0.189 |
| 956 | Plant 1 | 2023-03-26 | 288 | 4684 | 0.010 | 0.165 |
| 959 | Plant 1 | 2023-03-28 | 3543 | 21334 | 0.125 | 0.752 |
| 962 | Plant 1 | 2023-03-30 | 1214 | 10690 | 0.043 | 0.377 |
| 965 | Plant 1 | 2023-04-02 | 6159 | 15896 | 0.217 | 0.561 |
| 968 | Plant 1 | 2023-04-04 | 804 | 11465 | 0.028 | 0.404 |
| 971 | Plant 1 | 2023-04-05 | 0 | 3577 | 0.000 | 0.126 |
| 974 | Plant 1 | 2023-04-10 | 0 | 2838 | 0.000 | 0.100 |
| 977 | Plant 1 | 2023-04-11 | 636 | 0 | 0.022 | 0.000 |
| 980 | Plant 1 | 2023-04-13 | 0 | 5843 | 0.000 | 0.206 |
| 983 | Plant 1 | 2023-04-17 | 0 | 11788 | 0.000 | 0.416 |
| 986 | Plant 1 | 2023-04-19 | 0 | 6732 | 0.000 | 0.237 |
| 989 | Plant 1 | 2023-04-20 | 0 | 1004 | 0.000 | 0.035 |
| 992 | Plant 1 | 2023-04-23 | 0 | 1634 | 0.000 | 0.058 |
| 995 | Plant 1 | 2023-04-26 | 0 | 0 | 0.000 | 0.000 |
| 998 | Plant 1 | 2023-04-29 | 0 | 0 | 0.000 | 0.000 |
| 1001 | Plant 1 | 2023-05-02 | 0 | 3753 | 0.000 | 0.132 |
| 1004 | Plant 1 | 2023-05-05 | 0 | 6977 | 0.000 | 0.246 |
| 1007 | Plant 1 | 2023-05-08 | 0 | 0 | 0.000 | 0.000 |
| 1010 | Plant 1 | 2023-05-11 | 0 | 0 | 0.000 | 0.000 |
| 1012 | Plant 1 | 2023-05-13 | 0 | 0 | 0.000 | 0.000 |
| 1021 | Plant 1 | 2023-05-11 | 0 | 0 | 0.000 | 0.000 |
| 1024 | Plant 1 | 2023-05-14 | 0 | 0 | 0.000 | 0.000 |
| 1027 | Plant 1 | 2023-05-16 | 0 | 0 | 0.000 | 0.000 |
| 1029 | Plant 1 | 2023-05-18 | 0 | 0 | 0.000 | 0.000 |
| 1033 | Plant 1 | 2023-05-21 | 0 | 906 | 0.000 | 0.032 |
| 1036 | Plant 1 | 2023-05-23 | 0 | 0 | 0.000 | 0.000 |
| 1039 | Plant 1 | 2023-05-25 | 0 | 0 | 0.000 | 0.000 |
| 1042 | Plant 1 | 2023-05-29 | 0 | 0 | 0.000 | 0.000 |
| 1044 | Plant 1 | 2023-05-30 | 732 | 0 | 0.026 | 0.000 |
| 1047 | Plant 1 | 2023-06-01 | 0 | 0 | 0.000 | 0.000 |
| 1050 | Plant 1 | 2023-06-04 | 0 | 0 | 0.000 | 0.000 |
| 1053 | Plant 1 | 2023-06-07 | 0 | 0 | 0.000 | 0.000 |
| 1056 | Plant 1 | 2023-06-08 | 0 | 0 | 0.000 | 0.000 |
| 1059 | Plant 1 | 2023-06-11 | 0 | 0 | 0.000 | 0.000 |
| 1062 | Plant 1 | 2023-06-13 | 0 | 0 | 0.000 | 0.000 |
| 1065 | Plant 1 | 2023-06-15 | 705 | 0 | 0.025 | 0.000 |
| 1068 | Plant 1 | 2023-06-18 | 0 | 0 | 0.000 | 0.000 |
| 1071 | Plant 1 | 2023-06-20 | 0 | 0 | 0.000 | 0.000 |
| 1074 | Plant 1 | 2023-06-22 | 0 | 0 | 0.000 | 0.000 |
| 665 | Plant 2 | 2022-10-10 | 936 | 0 | 0.018 | 0.000 |
| 670 | Plant 2 | 2022-10-12 | 2537 | 0 | 0.048 | 0.000 |
| 675 | Plant 2 | 2022-10-14 | 2242 | 2273 | 0.042 | 0.043 |
| 680 | Plant 2 | 2022-10-17 | 1085 | 0 | 0.020 | 0.000 |
| 685 | Plant 2 | 2022-10-19 | 730 | 0 | 0.014 | 0.000 |
| 690 | Plant 2 | 2022-10-21 | 2987 | 0 | 0.056 | 0.000 |
| 695 | Plant 2 | 2022-10-24 | 379 | 0 | 0.007 | 0.000 |
| 700 | Plant 2 | 2022-10-25 | 363 | 0 | 0.007 | 0.000 |
| 705 | Plant 2 | 2022-10-27 | 1400 | 0 | 0.026 | 0.000 |
| 710 | Plant 2 | 2022-10-31 | 1043 | 0 | 0.020 | 0.000 |
| 714 | Plant 2 | 2022-11-02 | 1028 | 0 | 0.019 | 0.000 |
| 719 | Plant 2 | 2022-11-04 | 0 | 0 | 0.000 | 0.000 |
| 724 | Plant 2 | 2022-11-07 | 450 | 0 | 0.008 | 0.000 |
| 729 | Plant 2 | 2022-11-09 | 4042 | 0 | 0.076 | 0.000 |
| 734 | Plant 2 | 2022-11-11 | 2426 | 0 | 0.046 | 0.000 |
| 739 | Plant 2 | 2022-11-14 | 975 | 283 | 0.018 | 0.005 |
| 743 | Plant 2 | 2022-11-16 | 6702 | 0 | 0.126 | 0.000 |
| 752 | Plant 2 | 2022-11-18 | 10054 | 0 | 0.189 | 0.000 |
| 757 | Plant 2 | 2022-11-21 | 2588 | 403 | 0.049 | 0.008 |
| 762 | Plant 2 | 2022-11-23 | 78818 | 13186 | 1.481 | 0.248 |
| 767 | Plant 2 | 2022-11-25 | 9105 | 0 | 0.171 | 0.000 |
| 772 | Plant 2 | 2022-11-28 | 13729 | 2481 | 0.258 | 0.047 |
| 777 | Plant 2 | 2022-11-30 | 80084 | 4695 | 1.505 | 0.088 |
| 782 | Plant 2 | 2022-12-02 | 24984 | 2728 | 0.470 | 0.051 |
| 787 | Plant 2 | 2022-12-05 | 7158 | 593 | 0.135 | 0.011 |
| 792 | Plant 2 | 2022-12-07 | 73903 | 21716 | 1.389 | 0.408 |
| 797 | Plant 2 | 2022-12-09 | 27138 | 2039 | 0.510 | 0.038 |
| 802 | Plant 2 | 2022-12-12 | 39405 | 2233 | 0.741 | 0.042 |
| 807 | Plant 2 | 2022-12-14 | 267009 | 9636 | 5.018 | 0.181 |
| 812 | Plant 2 | 2022-12-16 | 96636 | 1071 | 1.816 | 0.020 |
| 817 | Plant 2 | 2022-12-19 | 324726 | 3013 | 6.103 | 0.057 |
| 822 | Plant 2 | 2022-12-21 | 87252 | 2325 | 1.640 | 0.044 |
| 827 | Plant 2 | 2022-12-23 | 2421 | 0 | 0.045 | 0.000 |
| 832 | Plant 2 | 2022-12-27 | 308165 | 15085 | 5.792 | 0.284 |
| 837 | Plant 2 | 2022-12-28 | 82988 | 3643 | 1.560 | 0.068 |
| 842 | Plant 2 | 2022-12-30 | 93006 | 3581 | 1.748 | 0.067 |
| 847 | Plant 2 | 2023-01-02 | 21319 | 4015 | 0.401 | 0.075 |
| 849 | Plant 2 | 2023-01-04 | 33266 | 563 | 0.625 | 0.011 |
| 851 | Plant 2 | 2023-01-05 | 276414 | 34369 | 5.195 | 0.646 |
| 857 | Plant 2 | 2023-01-09 | 3543 | 2310 | 0.067 | 0.043 |
| 858 | Plant 2 | 2023-01-11 | 86605 | 18897 | 1.628 | 0.355 |
| 863 | Plant 2 | 2023-01-13 | 6993 | 3944 | 0.131 | 0.074 |
| 865 | Plant 2 | 2023-01-16 | 4928 | 5437 | 0.093 | 0.102 |
| 866 | Plant 2 | 2023-01-18 | 23056 | 14209 | 0.433 | 0.267 |
| 872 | Plant 2 | 2023-01-20 | 3835 | 3358 | 0.072 | 0.063 |
| 874 | Plant 2 | 2023-01-23 | 6870 | 27483 | 0.129 | 0.517 |
| 877 | Plant 2 | 2023-01-25 | 26688 | 18349 | 0.502 | 0.345 |
| 878 | Plant 2 | 2023-01-27 | 6732 | 9677 | 0.127 | 0.182 |
| 883 | Plant 2 | 2023-01-30 | 3880 | 9910 | 0.073 | 0.186 |
| 886 | Plant 2 | 2023-02-01 | 10917 | 8139 | 0.205 | 0.153 |
| 889 | Plant 2 | 2023-02-03 | 8966 | 21046 | 0.169 | 0.396 |
| 892 | Plant 2 | 2023-02-06 | 24982 | 22152 | 0.470 | 0.416 |
| 895 | Plant 2 | 2023-02-08 | 18603 | 45321 | 0.350 | 0.852 |
| 898 | Plant 2 | 2023-02-10 | 21720 | 54952 | 0.408 | 1.033 |
| 901 | Plant 2 | 2023-02-13 | 12929 | 23413 | 0.243 | 0.440 |
| 904 | Plant 2 | 2023-02-15 | 13891 | 51511 | 0.261 | 0.968 |
| 907 | Plant 2 | 2023-02-17 | 27193 | 63729 | 0.511 | 1.198 |
| 910 | Plant 2 | 2023-02-20 | 11481 | 33609 | 0.216 | 0.632 |
| 913 | Plant 2 | 2023-02-22 | 30587 | 64045 | 0.575 | 1.204 |
| 916 | Plant 2 | 2023-02-24 | 32816 | 58078 | 0.617 | 1.092 |
| 919 | Plant 2 | 2023-02-27 | 20658 | 56407 | 0.388 | 1.060 |
| 922 | Plant 2 | 2023-03-01 | 18139 | 39478 | 0.341 | 0.742 |
| 925 | Plant 2 | 2023-03-03 | 15080 | 55059 | 0.283 | 1.035 |
| 928 | Plant 2 | 2023-03-06 | 4960 | 14733 | 0.093 | 0.277 |
| 931 | Plant 2 | 2023-03-08 | 4998 | 21643 | 0.094 | 0.407 |
| 934 | Plant 2 | 2023-03-10 | 4574 | 15028 | 0.086 | 0.282 |
| 937 | Plant 2 | 2023-03-13 | 6131 | 11675 | 0.115 | 0.219 |
| 940 | Plant 2 | 2023-03-15 | 2332 | 6628 | 0.044 | 0.125 |
| 943 | Plant 2 | 2023-03-17 | 2966 | 18614 | 0.056 | 0.350 |
| 946 | Plant 2 | 2023-03-20 | 1552 | 11539 | 0.029 | 0.217 |
| 949 | Plant 2 | 2023-03-22 | 4497 | 8925 | 0.085 | 0.168 |
| 952 | Plant 2 | 2023-03-24 | 1906 | 16130 | 0.036 | 0.303 |
| 955 | Plant 2 | 2023-03-27 | 499 | 6994 | 0.009 | 0.131 |
| 958 | Plant 2 | 2023-03-29 | 5193 | 16952 | 0.098 | 0.319 |
| 961 | Plant 2 | 2023-03-31 | 1943 | 10581 | 0.037 | 0.199 |
| 964 | Plant 2 | 2023-04-03 | 732 | 7467 | 0.014 | 0.140 |
| 967 | Plant 2 | 2023-04-05 | 751 | 27565 | 0.014 | 0.518 |
| 970 | Plant 2 | 2023-04-06 | 986 | 37678 | 0.019 | 0.708 |
| 973 | Plant 2 | 2023-04-11 | 279 | 10609 | 0.005 | 0.199 |
| 976 | Plant 2 | 2023-04-12 | 0 | 11917 | 0.000 | 0.224 |
| 979 | Plant 2 | 2023-04-14 | 0 | 1404 | 0.000 | 0.026 |
| 982 | Plant 2 | 2023-04-17 | 0 | 3824 | 0.000 | 0.072 |
| 985 | Plant 2 | 2023-04-19 | 1007 | 4610 | 0.019 | 0.087 |
| 988 | Plant 2 | 2023-04-21 | 0 | 1534 | 0.000 | 0.029 |
| 991 | Plant 2 | 2023-04-22 | 1096 | 0 | 0.021 | 0.000 |
| 994 | Plant 2 | 2023-04-25 | 0 | 2816 | 0.000 | 0.053 |
| 997 | Plant 2 | 2023-04-28 | 698 | 1909 | 0.013 | 0.036 |
| 1000 | Plant 2 | 2023-05-01 | 0 | 3029 | 0.000 | 0.057 |
| 1003 | Plant 2 | 2023-05-04 | 772 | 2272 | 0.015 | 0.043 |
| 1006 | Plant 2 | 2023-05-07 | 0 | 4700 | 0.000 | 0.088 |
| 1009 | Plant 2 | 2023-05-10 | 0 | 2186 | 0.000 | 0.041 |
| 1011 | Plant 2 | 2023-05-12 | 0 | 5866 | 0.000 | 0.110 |
| 1020 | Plant 2 | 2023-05-12 | 1252 | 993 | 0.024 | 0.019 |
| 1023 | Plant 2 | 2023-05-15 | 0 | 0 | 0.000 | 0.000 |
| 1026 | Plant 2 | 2023-05-17 | 0 | 4198 | 0.000 | 0.079 |
| 1031 | Plant 2 | 2023-05-19 | 0 | 3349 | 0.000 | 0.063 |
| 1032 | Plant 2 | 2023-05-22 | 0 | 0 | 0.000 | 0.000 |
| 1035 | Plant 2 | 2023-05-24 | 0 | 0 | 0.000 | 0.000 |
| 1038 | Plant 2 | 2023-05-26 | 0 | 362 | 0.000 | 0.007 |
| 1041 | Plant 2 | 2023-05-30 | 0 | 0 | 0.000 | 0.000 |
| 1043 | Plant 2 | 2023-05-31 | 624 | 377 | 0.012 | 0.007 |
| 1046 | Plant 2 | 2023-06-02 | 0 | 0 | 0.000 | 0.000 |
| 1049 | Plant 2 | 2023-06-05 | 0 | 0 | 0.000 | 0.000 |
| 1052 | Plant 2 | 2023-06-07 | 739 | 0 | 0.014 | 0.000 |
| 1055 | Plant 2 | 2023-06-09 | 0 | 359 | 0.000 | 0.007 |
| 1058 | Plant 2 | 2023-06-12 | 0 | 0 | 0.000 | 0.000 |
| 1061 | Plant 2 | 2023-06-14 | 0 | 0 | 0.000 | 0.000 |
| 1064 | Plant 2 | 2023-06-16 | 0 | 0 | 0.000 | 0.000 |
| 1067 | Plant 2 | 2023-06-19 | 0 | 0 | 0.000 | 0.000 |
| 1070 | Plant 2 | 2023-06-21 | 0 | 0 | 0.000 | 0.000 |
| 1073 | Plant 2 | 2023-06-23 | 0 | 0 | 0.000 | 0.000 |
| 669 | Plant 3 | 2022-10-09 | 809 | 0 | 0.016 | 0.000 |
| 674 | Plant 3 | 2022-10-11 | 3118 | 0 | 0.061 | 0.000 |
| 679 | Plant 3 | 2022-10-13 | 951 | 0 | 0.019 | 0.000 |
| 684 | Plant 3 | 2022-10-16 | 826 | 0 | 0.016 | 0.000 |
| 689 | Plant 3 | 2022-10-18 | 739 | 0 | 0.014 | 0.000 |
| 694 | Plant 3 | 2022-10-20 | 2357 | 0 | 0.046 | 0.000 |
| 699 | Plant 3 | 2022-10-23 | 860 | 0 | 0.017 | 0.000 |
| 704 | Plant 3 | 2022-10-25 | 0 | 0 | 0.000 | 0.000 |
| 709 | Plant 3 | 2022-10-27 | 0 | 0 | 0.000 | 0.000 |
| 718 | Plant 3 | 2022-11-02 | 867 | 0 | 0.017 | 0.000 |
| 723 | Plant 3 | 2022-11-04 | 0 | 0 | 0.000 | 0.000 |
| 728 | Plant 3 | 2022-11-07 | 924 | 0 | 0.018 | 0.000 |
| 733 | Plant 3 | 2022-11-09 | 2385 | 0 | 0.047 | 0.000 |
| 738 | Plant 3 | 2022-11-11 | 251 | 0 | 0.005 | 0.000 |
| 742 | Plant 3 | 2022-11-14 | 2010 | 0 | 0.039 | 0.000 |
| 747 | Plant 3 | 2022-11-16 | 5367 | 0 | 0.105 | 0.000 |
| 756 | Plant 3 | 2022-11-18 | 9596 | 0 | 0.188 | 0.000 |
| 761 | Plant 3 | 2022-11-21 | 2307 | 0 | 0.045 | 0.000 |
| 766 | Plant 3 | 2022-11-23 | 53644 | 0 | 1.051 | 0.000 |
| 771 | Plant 3 | 2022-11-25 | 10008 | 815 | 0.196 | 0.016 |
| 776 | Plant 3 | 2022-11-28 | 9503 | 1057 | 0.186 | 0.021 |
| 781 | Plant 3 | 2022-11-30 | 74008 | 0 | 1.449 | 0.000 |
| 786 | Plant 3 | 2022-12-02 | 31609 | 9370 | 0.619 | 0.184 |
| 791 | Plant 3 | 2022-12-05 | 9984 | 1481 | 0.196 | 0.029 |
| 796 | Plant 3 | 2022-12-07 | 301088 | 3368 | 5.897 | 0.066 |
| 801 | Plant 3 | 2022-12-09 | 39805 | 2304 | 0.780 | 0.045 |
| 806 | Plant 3 | 2022-12-12 | 73226 | 2362 | 1.434 | 0.046 |
| 811 | Plant 3 | 2022-12-14 | 293005 | 8837 | 5.738 | 0.173 |
| 816 | Plant 3 | 2022-12-16 | 91801 | 353 | 1.798 | 0.007 |
| 821 | Plant 3 | 2022-12-19 | 477015 | 651 | 9.342 | 0.013 |
| 826 | Plant 3 | 2022-12-21 | 88082 | 0 | 1.725 | 0.000 |
| 831 | Plant 3 | 2022-12-23 | 170407 | 510 | 3.337 | 0.010 |
| 836 | Plant 3 | 2022-12-27 | 205073 | 6420 | 4.016 | 0.126 |
| 841 | Plant 3 | 2022-12-28 | 105917 | 4409 | 2.074 | 0.086 |
| 846 | Plant 3 | 2022-12-30 | 41372 | 1818 | 0.810 | 0.036 |
| 848 | Plant 3 | 2023-01-02 | 22352 | 1219 | 0.438 | 0.024 |
| 850 | Plant 3 | 2023-01-04 | 24280 | 772 | 0.476 | 0.015 |
| 852 | Plant 3 | 2023-01-05 | 31824 | 3772 | 0.623 | 0.074 |
| 859 | Plant 3 | 2023-01-05 | 22482 | 4519 | 0.440 | 0.088 |
| 860 | Plant 3 | 2023-01-11 | 48923 | 8553 | 0.958 | 0.168 |
| 864 | Plant 3 | 2023-01-13 | 6967 | 909 | 0.136 | 0.018 |
| 867 | Plant 3 | 2023-01-16 | 6442 | 2048 | 0.126 | 0.040 |
| 868 | Plant 3 | 2023-01-18 | 4593 | 8973 | 0.090 | 0.176 |
| 873 | Plant 3 | 2023-01-20 | 3267 | 3006 | 0.064 | 0.059 |
| 876 | Plant 3 | 2023-01-23 | 9860 | 24653 | 0.193 | 0.483 |
| 880 | Plant 3 | 2023-01-24 | 2551 | 11510 | 0.050 | 0.225 |
| 882 | Plant 3 | 2023-01-26 | 5452 | 13131 | 0.107 | 0.257 |
| 885 | Plant 3 | 2023-01-30 | 540 | 5256 | 0.011 | 0.103 |
| 888 | Plant 3 | 2023-02-01 | 5504 | 19342 | 0.108 | 0.379 |
| 891 | Plant 3 | 2023-02-03 | 6263 | 10174 | 0.123 | 0.199 |
| 894 | Plant 3 | 2023-02-05 | 11459 | 15845 | 0.224 | 0.310 |
| 897 | Plant 3 | 2023-02-08 | 22824 | 18175 | 0.447 | 0.356 |
| 900 | Plant 3 | 2023-02-10 | 14079 | 58300 | 0.276 | 1.142 |
| 903 | Plant 3 | 2023-02-13 | 13311 | 27042 | 0.261 | 0.530 |
| 906 | Plant 3 | 2023-02-15 | 22912 | 24661 | 0.449 | 0.483 |
| 909 | Plant 3 | 2023-02-17 | 13854 | 17681 | 0.271 | 0.346 |
| 912 | Plant 3 | 2023-02-20 | 8139 | 17622 | 0.159 | 0.345 |
| 915 | Plant 3 | 2023-02-22 | 21637 | 17343 | 0.424 | 0.340 |
| 918 | Plant 3 | 2023-02-24 | 23409 | 13255 | 0.458 | 0.260 |
| 921 | Plant 3 | 2023-02-27 | 5350 | 19078 | 0.105 | 0.374 |
| 924 | Plant 3 | 2023-03-01 | 7209 | 16159 | 0.141 | 0.316 |
| 927 | Plant 3 | 2023-03-03 | 6495 | 21451 | 0.127 | 0.420 |
| 930 | Plant 3 | 2023-03-06 | 3261 | 8995 | 0.064 | 0.176 |
| 933 | Plant 3 | 2023-03-08 | 5882 | 18238 | 0.115 | 0.357 |
| 936 | Plant 3 | 2023-03-10 | 4381 | 15499 | 0.086 | 0.304 |
| 939 | Plant 3 | 2023-03-12 | 2827 | 10843 | 0.055 | 0.212 |
| 942 | Plant 3 | 2023-03-15 | 1669 | 7681 | 0.033 | 0.150 |
| 945 | Plant 3 | 2023-03-17 | 4920 | 7674 | 0.096 | 0.150 |
| 948 | Plant 3 | 2023-03-20 | 1370 | 4899 | 0.027 | 0.096 |
| 951 | Plant 3 | 2023-03-22 | 2381 | 4677 | 0.047 | 0.092 |
| 954 | Plant 3 | 2023-03-24 | 737 | 7398 | 0.014 | 0.145 |
| 957 | Plant 3 | 2023-03-27 | 927 | 10647 | 0.018 | 0.209 |
| 960 | Plant 3 | 2023-03-29 | 592 | 11392 | 0.012 | 0.223 |
| 963 | Plant 3 | 2023-03-31 | 5141 | 11014 | 0.101 | 0.216 |
| 966 | Plant 3 | 2023-04-03 | 1921 | 7274 | 0.038 | 0.142 |
| 969 | Plant 3 | 2023-04-05 | 1981 | 9356 | 0.039 | 0.183 |
| 972 | Plant 3 | 2023-04-06 | 732 | 9504 | 0.014 | 0.186 |
| 975 | Plant 3 | 2023-04-11 | 572 | 6624 | 0.011 | 0.130 |
| 978 | Plant 3 | 2023-04-12 | 1141 | 8164 | 0.022 | 0.160 |
| 981 | Plant 3 | 2023-04-14 | 0 | 13299 | 0.000 | 0.260 |
| 984 | Plant 3 | 2023-04-17 | 0 | 4855 | 0.000 | 0.095 |
| 987 | Plant 3 | 2023-04-19 | 1008 | 4950 | 0.020 | 0.097 |
| 990 | Plant 3 | 2023-04-21 | 1229 | 2023 | 0.024 | 0.040 |
| 993 | Plant 3 | 2023-04-24 | 0 | 0 | 0.000 | 0.000 |
| 996 | Plant 3 | 2023-04-27 | 0 | 921 | 0.000 | 0.018 |
| 999 | Plant 3 | 2023-04-30 | 0 | 2445 | 0.000 | 0.048 |
| 1002 | Plant 3 | 2023-05-03 | 0 | 0 | 0.000 | 0.000 |
| 1005 | Plant 3 | 2023-05-06 | 0 | 0 | 0.000 | 0.000 |
| 1008 | Plant 3 | 2023-05-09 | 0 | 0 | 0.000 | 0.000 |
| 1013 | Plant 3 | 2023-05-14 | 2101 | 1278 | 0.041 | 0.025 |
| 1022 | Plant 3 | 2023-05-12 | 0 | 0 | 0.000 | 0.000 |
| 1025 | Plant 3 | 2023-05-15 | 0 | 0 | 0.000 | 0.000 |
| 1028 | Plant 3 | 2023-05-17 | 1004 | 0 | 0.020 | 0.000 |
| 1030 | Plant 3 | 2023-05-19 | 0 | 0 | 0.000 | 0.000 |
| 1034 | Plant 3 | 2023-05-22 | 0 | 0 | 0.000 | 0.000 |
| 1037 | Plant 3 | 2023-05-24 | 801 | 532 | 0.016 | 0.010 |
| 1040 | Plant 3 | 2023-05-26 | 0 | 0 | 0.000 | 0.000 |
| 1045 | Plant 3 | 2023-05-31 | 0 | 0 | 0.000 | 0.000 |
| 1048 | Plant 3 | 2023-06-02 | 0 | 0 | 0.000 | 0.000 |
| 1051 | Plant 3 | 2023-06-05 | 0 | 0 | 0.000 | 0.000 |
| 1054 | Plant 3 | 2023-06-06 | 0 | 0 | 0.000 | 0.000 |
| 1057 | Plant 3 | 2023-06-09 | 0 | 0 | 0.000 | 0.000 |
| 1060 | Plant 3 | 2023-06-12 | 0 | 0 | 0.000 | 0.000 |
| 1063 | Plant 3 | 2023-06-14 | 0 | 0 | 0.000 | 0.000 |
| 1066 | Plant 3 | 2023-06-16 | 0 | 0 | 0.000 | 0.000 |
| 1069 | Plant 3 | 2023-06-19 | 0 | 0 | 0.000 | 0.000 |
| 1072 | Plant 3 | 2023-06-20 | 775 | 0 | 0.015 | 0.000 |

**Table S3.** Sum of influenza A and B concentration in wastewater detected in all plants in the same weeks in which clinical data were collected. Last column reported numbers of laboratory tests positive for influenza in Ticino Region.

| Year | Week | Corresponding date | A+B (copies/per capita) | Influenza positive Lab tests |
| --- | --- | --- | --- | --- |
| 2022 | 43 | 24 - 30 Oct | 0.03 | 1 |
| 2022 | 44 | 31 Oct- 6 Nov | 0.04 | 2 |
| 2022 | 45 | 07 - 13 Nov | 0.21 | 3 |
| 2022 | 46 | 14 - 20 Nov | 0.42 | 14 |
| 2022 | 47 | 21 - 27 Nov | 1.62 | 22 |
| 2022 | 48 | 28 Nov - 04 Dec | 2.39 | 51 |
| 2022 | 49 | 05 - 11 Dec | 4.63 | 86 |
| 2022 | 50 | 12 - 18 Dec | 8.25 | 134 |
| 2022 | 51 | 19 - 25 Dec | 9.29 | 179 |
| 2022 | 52 | 26 - 31 Dec | 7.29 | 170 |
| 2023 | 1 | 02 - 08 Jan | 4.31 | 122 |
| 2023 | 2 | 09 - 15 Jan | 1.91 | 35 |
| 2023 | 3 | 16 - 22 Jan | 1.26 | 20 |
| 2023 | 4 | 23- 29 Jan | 1.59 | 21 |
| 2023 | 5 | 30 Jan - 05 Feb | 1.31 | 26 |
| 2023 | 6 | 06 - 12 Feb | 2.80 | 48 |
| 2023 | 7 | 13 - 19 Feb | 2.93 | 51 |
| 2023 | 8 | 20 - 26 Feb | 3.43 | 65 |
| 2023 | 9 | 27 Feb - 05 Mar | 2.48 | 48 |
| 2023 | 10 | 06 - 12 Mar | 1.25 | 32 |
| 2023 | 11 | 13 - 19 Mar | 0.72 | 12 |
| 2023 | 12 | 20 - 26 Mar | 0.70 | 17 |
| 2023 | 13 | 27 Mar - 2 Apr | 0.66 | 12 |
| 2023 | 14 | 03 - 09 Apr | 0.70 | 4 |
| 2023 | 15 | 10 - 16 Apr | 0.75 | 7 |
| 2023 | 16 | 17 - 23 Apr | 0.83 | 3 |
| 2023 | 17 | 24 - 30 Apr | 0.07 | 2 |
| 2023 | 18 | 01 - 07 May | 0.16 | 0 |
| 2023 | 19 | 08 - 14 May | 0.10 | 0 |
| 2023 | 20 | 15 - 21 May | 0.07 | 0 |
